# Supplementary material for: Mechanisms of acid generation from ionic photoacid generators for extreme ultraviolet and electron beam lithography
Source: Royal Society of Chemistry journal article supplement (doi:10.1039/d4cp01814a), 2024-01-01
Supplement: d4cp01814a1.pdf [file d4cp01814a1.pdf]

## **Electronic Supplementary Information**

### **Mechanisms of acid generation from ionic photoacid generators for extreme ultraviolet and electron beam lithography**

Chengbin Fu,<sup>ab</sup> Kun Du,<sup>a</sup> Jie Xue,<sup>a</sup> Hanshen Xin,<sup>a</sup> Jianhua Zhang<sup>a</sup> and Haoyuan Li <sup>\*ab</sup>

<sup>a</sup>School of Microelectronics, Shanghai University, Shanghai 201800, China

<sup>b</sup>Department of Chemistry, College of Sciences, Shanghai University, Shanghai 200444,  
China

Email: [lihaoyuan@shu.edu.cn](mailto:lihaoyuan@shu.edu.cn)

**Table S1.** The VEA (eV) and BDE (eV) for different PAGs and ionic conformations calculated at the M062X-D3/6-311+G(d,p) level.

| TPS-Tf               |                |                |                |                |                |                |         |
|----------------------|----------------|----------------|----------------|----------------|----------------|----------------|---------|
|                      | Conformation 1 | Conformation 2 | Conformation 3 | Conformation 4 | Conformation 5 | Conformation 6 | Average |
| VEA                  | 1.84           | 1.61           | 1.68           | 1.64           | 1.64           | 1.78           | 1.70    |
| BDE                  | 0.23           | 0.22           | 0.23           | 0.18           | 0.15           | 0.23           | 0.21    |
| M-TPS-Tf             |                |                |                |                |                |                |         |
|                      | Conformation 1 | Conformation 2 | Conformation 3 | Conformation 4 | Conformation 5 | Conformation 6 | Average |
| VEA                  | 1.75           | 1.60           | 1.58           | 1.62           | 1.65           | 1.62           | 1.64    |
| BDE                  | 0.24           | 0.23           | 0.22           | 0.24           | 0.23           | 0.20           | 0.23    |
| F-TPS-Tf             |                |                |                |                |                |                |         |
|                      | Conformation 1 | Conformation 2 | Conformation 3 | Conformation 4 | Conformation 5 | Conformation 6 | Average |
| VEA                  | 1.83           | 1.66           | 1.66           | 1.67           | 1.85           | 1.85           | 1.75    |
| BDE                  | 0.28           | 0.26           | 0.25           | 0.23           | 0.28           | 0.27           | 0.26    |
| TPS-Nf               |                |                |                |                |                |                |         |
|                      | Conformation 1 | Conformation 2 | Conformation 3 | Conformation 4 | Conformation 5 | Conformation 6 | Average |
| VEA                  | 1.79           | 1.68           | 1.67           | 1.79           | 1.79           | 1.78           | 1.75    |
| BDE                  | 0.25           | 0.28           | 0.24           | 0.25           | 0.25           | 0.20           | 0.25    |
| TPS-PF <sub>6</sub>  |                |                |                |                |                |                |         |
|                      | Conformation 1 | Conformation 2 | Conformation 3 | Conformation 4 | Conformation 5 | Conformation 6 | Average |
| VEA                  | 1.80           | 1.64           | 1.64           | 1.57           | 1.64           | 1.75           | 1.67    |
| BDE                  | 0.18           | 0.15           | 0.15           | 0.15           | 0.18           | 0.16           | 0.16    |
| TPS-SbF <sub>6</sub> |                |                |                |                |                |                |         |
|                      | Conformation 1 | Conformation 2 | Conformation 3 | Conformation 4 | Conformation 5 | Conformation 6 | Average |
| VEA                  | 1.64           | 1.63           | 1.63           | 1.63           | 1.64           | 1.62           | 1.63    |
| BDE                  | 0.16           | 0.19           | 0.19           | 0.20           | 0.23           | 0.20           | 0.20    |
| TPS-TSM              |                |                |                |                |                |                |         |
|                      | Conformation 1 | Conformation 2 | Conformation 3 | Conformation 4 | Conformation 5 | Conformation 6 | Average |
| VEA                  | 1.64           | 1.14           | 1.14           | 1.66           | 1.64           | 1.62           | 1.47    |
| BDE                  | 0.48           | 0.51           | 0.50           | 0.52           | 0.53           | 0.38           | 0.49    |
| TPS-CPDI             |                |                |                |                |                |                |         |
|                      | Conformation 1 | Conformation 2 | Conformation 3 | Conformation 4 | Conformation 5 | Conformation 6 | Average |
| VEA                  | 1.70           | 1.80           | 1.72           | 1.72           | 1.83           | 1.88           | 1.78    |
| BDE                  | 0.32           | 0.51           | 0.48           | 0.53           | 0.50           | 0.60           | 0.49    |
| PAG-3                |                |                |                |                |                |                |         |
|                      | Conformation 1 | Conformation 2 | Conformation 3 | Conformation 4 | Conformation 5 | Conformation 6 | Average |
| VEA                  | 1.73           | 1.82           | 1.82           | 1.80           | 1.80           | 1.80           | 1.80    |
| BDE                  | 0.38           | 0.45           | 0.45           | 0.45           | 0.45           | 0.52           | 0.45    |
| PAG-4                |                |                |                |                |                |                |         |
|                      | Conformation 1 | Conformation 2 | Conformation 3 | Conformation 4 | Conformation 5 | Conformation 6 | Average |
| VEA                  | 1.75           | 1.89           | 1.75           | 1.70           | 1.78           | 1.80           | 1.78    |
| BDE                  | 0.38           | 0.52           | 0.60           | 0.69           | 0.61           | 0.54           | 0.56    |
| PAG-2-Nf             |                |                |                |                |                |                |         |
|                      | Conformation 1 | Conformation 2 | Conformation 3 | Conformation 4 | Conformation 5 | Conformation 6 | Average |
| VEA                  | 1.63           | 1.46           | 1.68           | 1.47           | 1.54           | 1.52           | 1.55    |
| BDE                  | 0.23           | 0.22           | 0.39           | 0.26           | 0.26           | 0.37           | 0.29    |
| PAG-1-Tf             |                |                |                |                |                |                |         |
|                      | Conformation 1 | Conformation 2 | Conformation 3 | Conformation 4 | Conformation 5 | Conformation 6 | Average |
| VEA                  | 1.54           | 1.61           | 1.58           | 1.63           | 1.57           | 1.59           | 1.59    |
| BDE                  | 0.22           | 0.35           | 0.36           | 0.35           | 0.39           | 0.36           | 0.34    |
| I-TPS-Tf             |                |                |                |                |                |                |         |
|                      | Conformation 1 | Conformation 2 | Conformation 3 | Conformation 4 | Conformation 5 | Conformation 6 | Average |
| VEA                  | 1.95           | 1.71           | 1.95           | 1.74           | 1.86           | 1.97           | 1.86    |
| BDE                  | 0.25           | 0.19           | 0.24           | 0.20           | 0.29           | 0.31           | 0.25    |

| PAG-5-Nf  |                |                |                |                |                |                |         |
|-----------|----------------|----------------|----------------|----------------|----------------|----------------|---------|
|           | Conformation 1 | Conformation 2 | Conformation 3 | Conformation 4 | Conformation 5 | Conformation 6 | Average |
| VEA       | 2.48           | 2.32           | 2.34           | 2.31           | 2.30           | 2.30           | 2.34    |
| BDE       | 0.46           | 0.33           | 0.29           | 0.30           | 0.28           | 0.29           | 0.33    |
| PAG-6-Tf  |                |                |                |                |                |                |         |
|           | Conformation 1 | Conformation 2 | Conformation 3 | Conformation 4 | Conformation 5 | Conformation 6 | Average |
| VEA       | 2.49           | 2.52           | 2.51           | 2.54           | 2.54           | 2.54           | 2.52    |
| BDE       | 0.24           | 0.22           | 0.22           | 0.22           | 0.22           | 0.22           | 0.22    |
| PAG-7-Nf  |                |                |                |                |                |                |         |
|           | Conformation 1 | Conformation 2 | Conformation 3 | Conformation 4 | Conformation 5 | Conformation 6 | Average |
| VEA       | 2.55           | 2.55           | 2.54           | 2.57           | 2.52           | 2.52           | 2.54    |
| BDE       | 0.33           | 0.23           | 0.22           | 0.23           | 0.24           | 0.24           | 0.25    |
| DPI-Tf    |                |                |                |                |                |                |         |
|           | Conformation 1 | Conformation 2 | Conformation 3 | Conformation 4 | Conformation 5 | Conformation 6 | Average |
| VEA       | 2.03           | 2.12           | 2.12           | 2.12           | 2.12           | 2.11           | 2.10    |
| BDE       | 0.12           | 0.12           | 0.12           | 0.12           | 0.11           | 0.14           | 0.12    |
| DPI-Nf    |                |                |                |                |                |                |         |
|           | Conformation 1 | Conformation 2 | Conformation 3 | Conformation 4 | Conformation 5 | Conformation 6 | Average |
| VEA       | 2.15           | 2.11           | 2.13           | 2.13           | 2.13           | 2.12           | 2.13    |
| BDE       | 0.13           | 0.15           | 0.14           | 0.14           | 0.13           | 0.14           | 0.14    |
| BBI-Tf    |                |                |                |                |                |                |         |
|           | Conformation 1 | Conformation 2 | Conformation 3 | Conformation 4 | Conformation 5 | Conformation 6 | Average |
| VEA       | 1.92           | 2.02           | 2.01           | 1.92           | 2.01           | 2.00           | 1.98    |
| BDE       | 0.11           | 0.11           | 0.11           | 0.11           | 0.11           | 0.19           | 0.12    |
| BBI-Nf    |                |                |                |                |                |                |         |
|           | Conformation 1 | Conformation 2 | Conformation 3 | Conformation 4 | Conformation 5 | Conformation 6 | Average |
| VEA       | 2.00           | 1.98           | 1.99           | 1.99           | 1.92           | 1.92           | 1.97    |
| BDE       | 0.13           | 0.12           | 0.14           | 0.12           | 0.14           | 0.21           | 0.14    |
| BBI-TSM   |                |                |                |                |                |                |         |
|           | Conformation 1 | Conformation 2 | Conformation 3 | Conformation 4 | Conformation 5 | Conformation 6 | Average |
| VEA       | 2.20           | 2.31           | 2.32           | 2.33           | 2.23           | 2.24           | 2.27    |
| BDE       | 0.21           | 0.26           | 0.25           | 0.25           | 0.35           | 0.32           | 0.27    |
| PAG-8-Nf  |                |                |                |                |                |                |         |
|           | Conformation 1 | Conformation 2 | Conformation 3 | Conformation 4 | Conformation 5 | Conformation 6 | Average |
| VEA       | 1.91           | 1.88           | 1.89           | 1.89           | 1.88           | 1.88           | 1.89    |
| BDE       | 0.23           | 0.03           | 0.22           | 0.22           | 0.18           | 0.18           | 0.18    |
| BBI-CPDI  |                |                |                |                |                |                |         |
|           | Conformation 1 | Conformation 2 | Conformation 3 | Conformation 4 | Conformation 5 | Conformation 6 | Average |
| VEA       | 1.70           | 2.11           | 2.29           | 2.29           | 2.30           | 1.89           | 2.10    |
| BDE       | 0.14           | 0.33           | 0.32           | 0.32           | 0.32           | 0.33           | 0.29    |
| PAG-9-Tf  |                |                |                |                |                |                |         |
|           | Conformation 1 | Conformation 2 | Conformation 3 | Conformation 4 | Conformation 5 | Conformation 6 | Average |
| VEA       | 1.55           | 1.60           | 1.46           | 1.42           | 1.46           | 1.53           | 1.50    |
| BDE       | —              | —              | 0.14           | —              | 0.14           | 0.16           | 0.15    |
| PAG-10-Nf |                |                |                |                |                |                |         |
|           | Conformation 1 | Conformation 2 | Conformation 3 | Conformation 4 | Conformation 5 | Conformation 6 | Average |
| VEA       | 2.15           | 2.11           | 2.10           | 1.98           | 1.99           | 2.14           | 2.08    |
| BDE       | —              | —              | —              | 0.22           | 0.22           | —              | 0.22    |

**Table S2.** The Laplacian bond order (LBO) of S-C/I-C bonds for different PAGs and ionic conformations calculated at the M062X-D3/6-311+G(d,p) level.

| TPS-Tf                         |                |                |                |                |                |                |
|--------------------------------|----------------|----------------|----------------|----------------|----------------|----------------|
|                                | Conformation 1 | Conformation 2 | Conformation 3 | Conformation 4 | Conformation 5 | Conformation 6 |
| S <sub>1</sub> -C <sub>1</sub> | 0.6662         | 0.6641         | 0.6690         | 0.6744         | 0.6744         | 0.6604         |
| S <sub>1</sub> -C <sub>2</sub> | 0.6468         | 0.6528         | 0.6738         | 0.6670         | 0.6669         | 0.6796         |
| S <sub>1</sub> -C <sub>3</sub> | 0.6889         | 0.6791         | 0.6636         | 0.6950         | 0.6948         | 0.6700         |
| M-TPS-Tf                       |                |                |                |                |                |                |
|                                | Conformation 1 | Conformation 2 | Conformation 3 | Conformation 4 | Conformation 5 | Conformation 6 |
| S <sub>1</sub> -C <sub>1</sub> | 0.6799         | 0.6680         | 0.6736         | 0.6716         | 0.6690         | 0.6732         |
| S <sub>1</sub> -C <sub>2</sub> | 0.6523         | 0.6799         | 0.6784         | 0.6603         | 0.6752         | 0.6663         |
| S <sub>1</sub> -C <sub>3</sub> | 0.6808         | 0.6646         | 0.6680         | 0.6788         | 0.6636         | 0.6579         |
| F-TPS-Tf                       |                |                |                |                |                |                |
|                                | Conformation 1 | Conformation 2 | Conformation 3 | Conformation 4 | Conformation 5 | Conformation 6 |
| S <sub>1</sub> -C <sub>1</sub> | 0.6886         | 0.6729         | 0.6930         | 0.6941         | 0.6607         | 0.6607         |
| S <sub>1</sub> -C <sub>2</sub> | 0.6522         | 0.6483         | 0.6794         | 0.6513         | 0.6811         | 0.6811         |
| S <sub>1</sub> -C <sub>3</sub> | 0.6780         | 0.6795         | 0.6483         | 0.6680         | 0.6653         | 0.6653         |
| TPS-Nf                         |                |                |                |                |                |                |
|                                | Conformation 1 | Conformation 2 | Conformation 3 | Conformation 4 | Conformation 5 | Conformation 6 |
| S <sub>1</sub> -C <sub>1</sub> | 0.6650         | 0.6653         | 0.6592         | 0.6650         | 0.6649         | 0.6836         |
| S <sub>1</sub> -C <sub>2</sub> | 0.6493         | 0.6572         | 0.6655         | 0.6493         | 0.6493         | 0.6726         |
| S <sub>1</sub> -C <sub>3</sub> | 0.6739         | 0.6738         | 0.6777         | 0.6739         | 0.6739         | 0.6515         |
| TPS-PF <sub>6</sub>            |                |                |                |                |                |                |
|                                | Conformation 1 | Conformation 2 | Conformation 3 | Conformation 4 | Conformation 5 | Conformation 6 |
| S <sub>1</sub> -C <sub>1</sub> | 0.6735         | 0.6827         | 0.6626         | 0.6672         | 0.6591         | 0.6582         |
| S <sub>1</sub> -C <sub>2</sub> | 0.6546         | 0.6924         | 0.6790         | 0.6869         | 0.6790         | 0.6667         |
| S <sub>1</sub> -C <sub>3</sub> | 0.6758         | 0.6913         | 0.6733         | 0.6755         | 0.6649         | 0.6777         |
| TPS-SbF <sub>6</sub>           |                |                |                |                |                |                |
|                                | Conformation 1 | Conformation 2 | Conformation 3 | Conformation 4 | Conformation 5 | Conformation 6 |
| S <sub>1</sub> -C <sub>1</sub> | 0.6645         | 0.6781         | 0.6773         | 0.6810         | 0.6646         | 0.6819         |
| S <sub>1</sub> -C <sub>2</sub> | 0.6690         | 0.6828         | 0.6795         | 0.6758         | 0.6690         | 0.6879         |
| S <sub>1</sub> -C <sub>3</sub> | 0.6611         | 0.6766         | 0.6799         | 0.6837         | 0.6611         | 0.6767         |
| TPS-TSM                        |                |                |                |                |                |                |
|                                | Conformation 1 | Conformation 2 | Conformation 3 | Conformation 4 | Conformation 5 | Conformation 6 |
| S <sub>1</sub> -C <sub>1</sub> | 0.6689         | 0.6745         | 0.6676         | 0.6618         | 0.6478         | 0.6601         |
| S <sub>1</sub> -C <sub>2</sub> | 0.6674         | 0.6725         | 0.6719         | 0.6703         | 0.6655         | 0.6632         |
| S <sub>1</sub> -C <sub>3</sub> | 0.6736         | 0.6738         | 0.6688         | 0.6511         | 0.6630         | 0.6584         |
| TPS-CPDI                       |                |                |                |                |                |                |
|                                | Conformation 1 | Conformation 2 | Conformation 3 | Conformation 4 | Conformation 5 | Conformation 6 |
| S <sub>1</sub> -C <sub>1</sub> | 0.6728         | 0.6602         | 0.6562         | 0.6562         | 0.6725         | 0.6662         |
| S <sub>1</sub> -C <sub>2</sub> | 0.6732         | 0.6751         | 0.6801         | 0.6601         | 0.6815         | 0.6428         |
| S <sub>1</sub> -C <sub>3</sub> | 0.6823         | 0.6664         | 0.6601         | 0.6802         | 0.6598         | 0.6702         |
| PAG-3                          |                |                |                |                |                |                |
|                                | Conformation 1 | Conformation 2 | Conformation 3 | Conformation 4 | Conformation 5 | Conformation 6 |
| S <sub>1</sub> -C <sub>1</sub> | 0.6695         | 0.6652         | 0.6908         | 0.6624         | 0.6624         | 0.6595         |
| S <sub>1</sub> -C <sub>2</sub> | 0.6680         | 0.6418         | 0.6650         | 0.6519         | 0.6518         | 0.6523         |
| S <sub>1</sub> -C <sub>3</sub> | 0.6956         | 0.6909         | 0.6419         | 0.6847         | 0.6848         | 0.6861         |
| PAG-4                          |                |                |                |                |                |                |
|                                | Conformation 1 | Conformation 2 | Conformation 3 | Conformation 4 | Conformation 5 | Conformation 6 |
| S <sub>1</sub> -C <sub>1</sub> | 0.6747         | 0.6583         | 0.6788         | 0.6533         | 0.6544         | 0.6439         |
| S <sub>1</sub> -C <sub>2</sub> | 0.6784         | 0.6658         | 0.6532         | 0.6736         | 0.6627         | 0.6678         |
| S <sub>1</sub> -C <sub>3</sub> | 0.6477         | 0.6845         | 0.6641         | 0.6736         | 0.6779         | 0.6872         |
| PAG-2-Nf                       |                |                |                |                |                |                |
|                                | Conformation 1 | Conformation 2 | Conformation 3 | Conformation 4 | Conformation 5 | Conformation 6 |

|                                |                |                |                |                |                |                |
|--------------------------------|----------------|----------------|----------------|----------------|----------------|----------------|
| S <sub>1</sub> -C <sub>1</sub> | 0.6795         | 0.6712         | 0.6722         | 0.6658         | 0.6667         | 0.6521         |
| S <sub>1</sub> -C <sub>2</sub> | 0.6467         | 0.6769         | 0.6496         | 0.6868         | 0.6827         | 0.6790         |
| S <sub>1</sub> -C <sub>3</sub> | 0.7000         | 0.6942         | 0.6789         | 0.6755         | 0.6873         | 0.6616         |
| <b>PAG-1-Tf</b>                |                |                |                |                |                |                |
|                                | Conformation 1 | Conformation 2 | Conformation 3 | Conformation 4 | Conformation 5 | Conformation 6 |
| S <sub>1</sub> -C <sub>1</sub> | 0.6689         | 0.6726         | 0.6775         | 0.6746         | 0.6789         | 0.6730         |
| S <sub>1</sub> -C <sub>2</sub> | 0.5790         | 0.5587         | 0.5676         | 0.5542         | 0.5672         | 0.5507         |
| S <sub>1</sub> -C <sub>3</sub> | 0.6856         | 0.7077         | 0.7032         | 0.7131         | 0.7015         | 0.7153         |
| <b>I-TPS-Tf</b>                |                |                |                |                |                |                |
|                                | Conformation 1 | Conformation 2 | Conformation 3 | Conformation 4 | Conformation 5 | Conformation 6 |
| S <sub>1</sub> -C <sub>1</sub> | 0.6810         | 0.6737         | 0.6815         | 0.6748         | 0.6886         | 0.6881         |
| S <sub>1</sub> -C <sub>2</sub> | 0.6501         | 0.6591         | 0.6508         | 0.6703         | 0.6570         | 0.6681         |
| S <sub>1</sub> -C <sub>3</sub> | 0.6836         | 0.6816         | 0.6844         | 0.6671         | 0.6676         | 0.6537         |
| <b>PAG-5-Nf</b>                |                |                |                |                |                |                |
|                                | Conformation 1 | Conformation 2 | Conformation 3 | Conformation 4 | Conformation 5 | Conformation 6 |
| S <sub>1</sub> -C <sub>1</sub> | 0.6245         | 0.6284         | 0.6284         | 0.6284         | 0.6268         | 0.6213         |
| S <sub>1</sub> -C <sub>2</sub> | 0.6767         | 0.6782         | 0.6782         | 0.6782         | 0.6754         | 0.6667         |
| S <sub>1</sub> -C <sub>3</sub> | 0.7048         | 0.6961         | 0.6961         | 0.6961         | 0.7022         | 0.6979         |
| <b>PAG-6-Tf</b>                |                |                |                |                |                |                |
|                                | Conformation 1 | Conformation 2 | Conformation 3 | Conformation 4 | Conformation 5 | Conformation 6 |
| I <sub>1</sub> -C <sub>1</sub> | 0.3922         | 0.4044         | 0.4080         | 0.4101         | 0.4100         | 0.3914         |
| I <sub>1</sub> -C <sub>2</sub> | 0.4041         | 0.3949         | 0.4005         | 0.3914         | 0.3913         | 0.4101         |
| <b>PAG-7-Nf</b>                |                |                |                |                |                |                |
|                                | Conformation 1 | Conformation 2 | Conformation 3 | Conformation 4 | Conformation 5 | Conformation 6 |
| I <sub>1</sub> -C <sub>1</sub> | 0.3850         | 0.4067         | 0.4012         | 0.3833         | 0.4065         | 0.4065         |
| I <sub>1</sub> -C <sub>2</sub> | 0.4101         | 0.3835         | 0.3934         | 0.4167         | 0.3995         | 0.3996         |
| <b>DPI-Tf</b>                  |                |                |                |                |                |                |
|                                | Conformation 1 | Conformation 2 | Conformation 3 | Conformation 4 | Conformation 5 | Conformation 6 |
| I <sub>1</sub> -C <sub>1</sub> | 0.3125         | 0.3669         | 0.3668         | 0.2996         | 0.3669         | 0.3089         |
| I <sub>1</sub> -C <sub>2</sub> | 0.3693         | 0.3008         | 0.2996         | 0.3666         | 0.3007         | 0.3692         |
| <b>DPI-Nf</b>                  |                |                |                |                |                |                |
|                                | Conformation 1 | Conformation 2 | Conformation 3 | Conformation 4 | Conformation 5 | Conformation 6 |
| I <sub>1</sub> -C <sub>1</sub> | 0.2923         | 0.3029         | 0.3674         | 0.3060         | 0.3061         | 0.3034         |
| I <sub>1</sub> -C <sub>2</sub> | 0.3750         | 0.3725         | 0.3044         | 0.3639         | 0.3636         | 0.3713         |
| <b>BBI-Tf</b>                  |                |                |                |                |                |                |
|                                | Conformation 1 | Conformation 2 | Conformation 3 | Conformation 4 | Conformation 5 | Conformation 6 |
| I <sub>1</sub> -C <sub>1</sub> | 0.3178         | 0.2998         | 0.3061         | 0.3164         | 0.3061         | 0.3054         |
| I <sub>1</sub> -C <sub>2</sub> | 0.3577         | 0.3695         | 0.3640         | 0.3563         | 0.3641         | 0.3628         |
| <b>BBI-Nf</b>                  |                |                |                |                |                |                |
|                                | Conformation 1 | Conformation 2 | Conformation 3 | Conformation 4 | Conformation 5 | Conformation 6 |
| I <sub>1</sub> -C <sub>1</sub> | 0.3029         | 0.3061         | 0.3105         | 0.3105         | 0.3152         | 0.3152         |
| I <sub>1</sub> -C <sub>2</sub> | 0.3651         | 0.3606         | 0.3627         | 0.3627         | 0.3652         | 0.3652         |
| <b>BBI-TSM</b>                 |                |                |                |                |                |                |
|                                | Conformation 1 | Conformation 2 | Conformation 3 | Conformation 4 | Conformation 5 | Conformation 6 |
| I <sub>1</sub> -C <sub>1</sub> | 0.2670         | 0.3132         | 0.3153         | 0.3144         | 0.2767         | 0.2693         |
| I <sub>1</sub> -C <sub>2</sub> | 0.3429         | 0.2785         | 0.2764         | 0.2757         | 0.3304         | 0.3329         |
| <b>PAG-8-Nf</b>                |                |                |                |                |                |                |
|                                | Conformation 1 | Conformation 2 | Conformation 3 | Conformation 4 | Conformation 5 | Conformation 6 |
| I <sub>1</sub> -C <sub>1</sub> | 0.3062         | 0.3827         | 0.3131         | 0.3817         | 0.3156         | 0.3853         |
| I <sub>1</sub> -C <sub>2</sub> | 0.3834         | 0.3124         | 0.3817         | 0.3131         | 0.3854         | 0.3155         |
| <b>BBI-CPDI</b>                |                |                |                |                |                |                |
|                                | Conformation 1 | Conformation 2 | Conformation 3 | Conformation 4 | Conformation 5 | Conformation 6 |
| I <sub>1</sub> -C <sub>1</sub> | 0.3460         | 0.2817         | 0.2990         | 0.2801         | 0.2810         | 0.2921         |
| I <sub>1</sub> -C <sub>2</sub> | 0.2952         | 0.2834         | 0.2801         | 0.2989         | 0.2992         | 0.2871         |
| <b>PAG-9-Tf</b>                |                |                |                |                |                |                |

|                                | Conformation 1 | Conformation 2 | Conformation 3 | Conformation 4 | Conformation 5 | Conformation 6 |
|--------------------------------|----------------|----------------|----------------|----------------|----------------|----------------|
| S <sub>1</sub> -C <sub>1</sub> | 0.6712         | 0.6923         | 0.6902         | 0.6646         | 0.6907         | 0.6696         |
| S <sub>1</sub> -C <sub>2</sub> | 0.6225         | 0.6117         | 0.5940         | 0.6307         | 0.6309         | 0.6367         |
| S <sub>1</sub> -C <sub>3</sub> | 0.7042         | 0.7017         | 0.6881         | 0.6895         | 0.6692         | 0.7041         |
| PAG-10-Nf                      |                |                |                |                |                |                |
|                                | Conformation 1 | Conformation 2 | Conformation 3 | Conformation 4 | Conformation 5 | Conformation 6 |
| S <sub>1</sub> -C <sub>1</sub> | 0.6249         | 0.6369         | 0.6380         | 0.6356         | 0.6199         | 0.6416         |
| S <sub>1</sub> -C <sub>2</sub> | 0.6582         | 0.6675         | 0.6617         | 0.6600         | 0.6543         | 0.6955         |
| S <sub>1</sub> -C <sub>3</sub> | 0.6866         | 0.6935         | 0.7042         | 0.6814         | 0.6833         | 0.6663         |

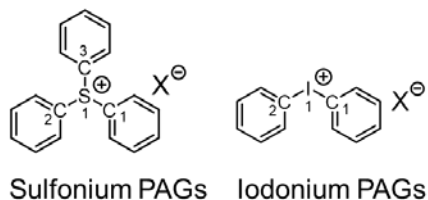

**Table S3.** Calculated energy barriers (eV) for the PAG anion (Tf) capturing a proton from DPS<sup>+</sup>.

| Position of proton          |      |      |      |      |      |
|-----------------------------|------|------|------|------|------|
| Proton transfer energy (eV) | 1.39 | 1.42 | 1.32 | 1.47 | 1.60 |

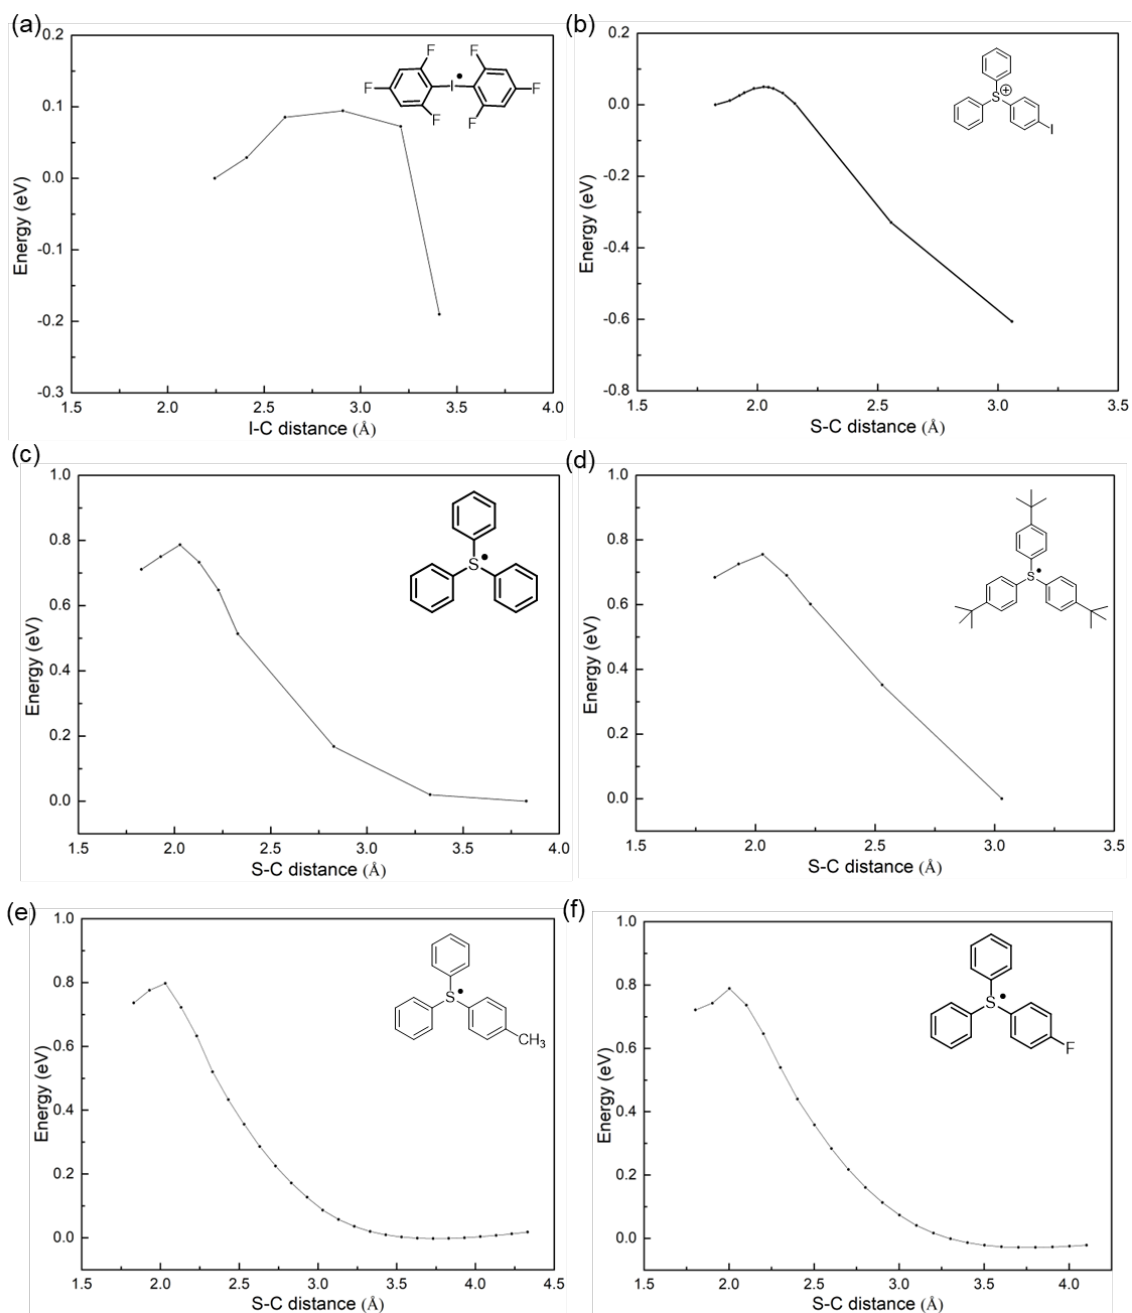

**Figure S1.** The potential energy as a function of the S-C/I-C bond length: (a) the radical dissociated from PAG-6-Tf and PAG-7-Nf, (b) the radical dissociated from I-TPS-Tf, (c) the radical dissociated from TPS-Tf, TPS-Nf, TPS-PF<sub>6</sub>, TPS-SbF<sub>6</sub>, TPS-TSM, TPS-CPDI, PAG-3, and PAG-4, (d) the radical dissociated from PAG-2-Nf, (e) the radical dissociated from M-TPS-Tf, and (f) the radical dissociated from F-TPS-Tf.

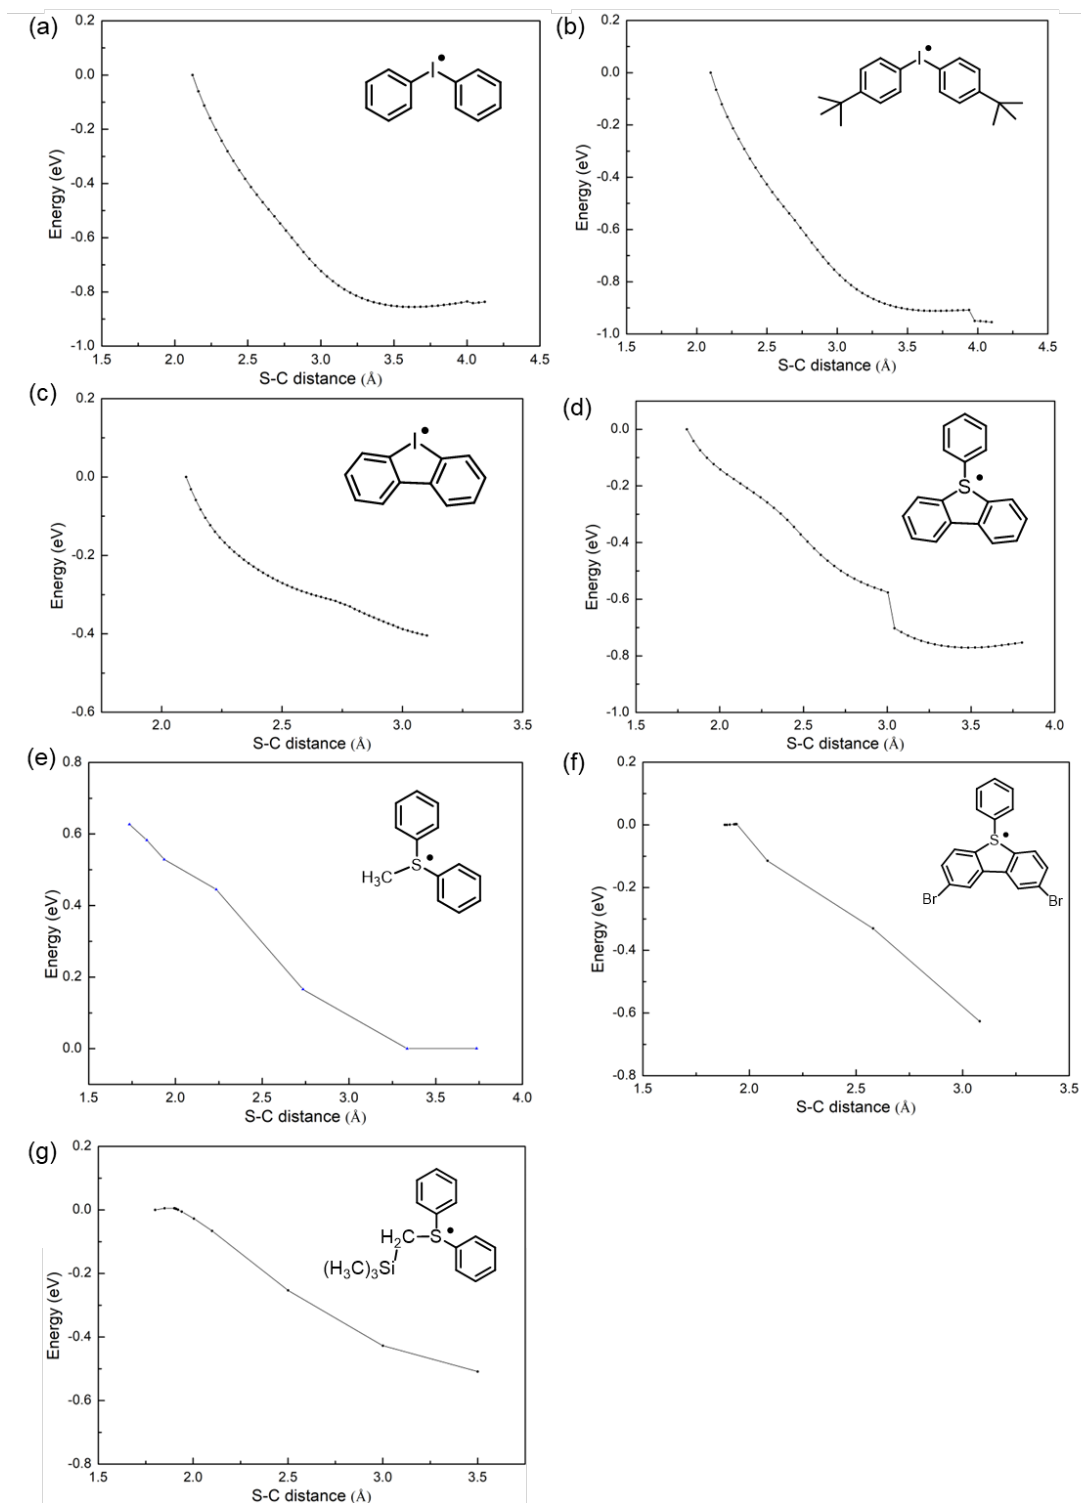

**Figure S2.** The potential energy as a function of the S-C/I-C bond length: (a) the radical dissociated from DPI-Tf and DPI-Nf, (b) the radical dissociated from BBI-Tf, BBI-Nf, BBI-TSM and BBI-CPDI, (c) the radical dissociated from PAG-8-Nf, (d) the radical dissociated from PAG-10-Nf (e) the radical dissociated from PAG-9-Tf, (f) the radical dissociated from PAG-5-Nf, and (g) the radical dissociated from PAG-1-Tf.



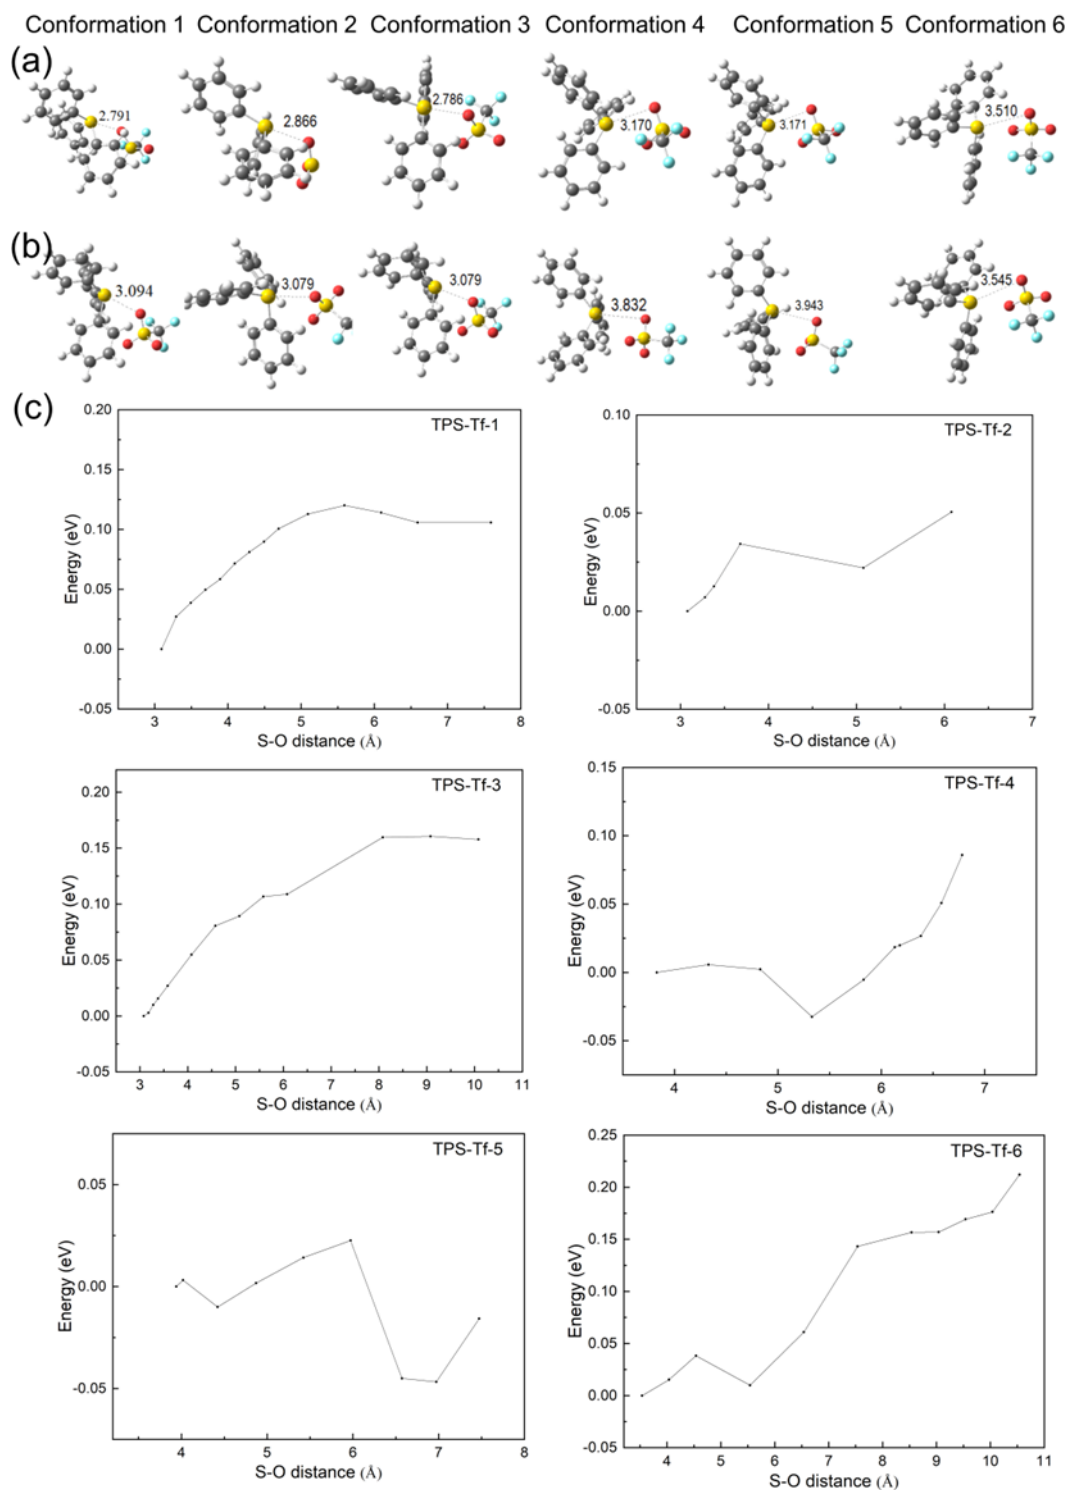

**Figure S3.** (a) The six different conformations of TPS-Tf before secondary electron attachment. (b) The six different conformations of TPS-Tf after secondary electron attachment. (c) The potential energy as a function of the S-O bond length for the six different conformations of TPS-Tf after secondary electron attachment.

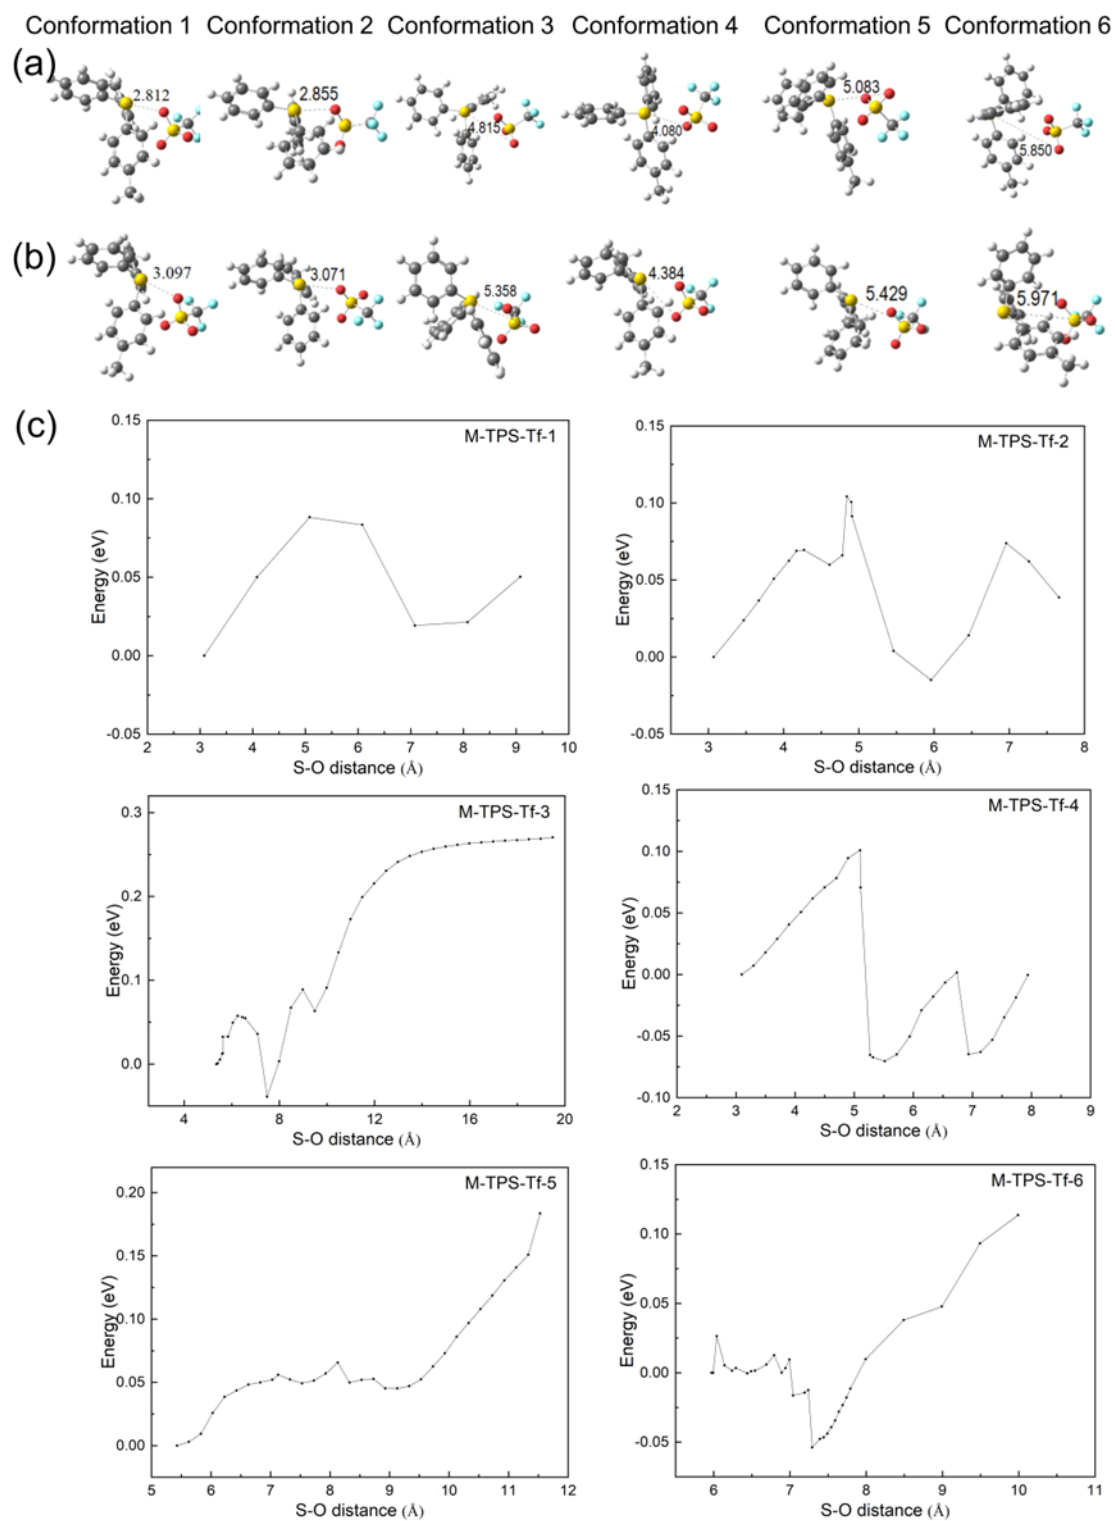

**Figure S4.** (a) The six different conformations of M-TPS-Tf before secondary electron attachment. (b) The six different conformations of M-TPS-Tf after secondary electron attachment. (c) The potential energy as a function of the S-O bond length for the six different conformations of M-TPS-Tf after secondary electron attachment.

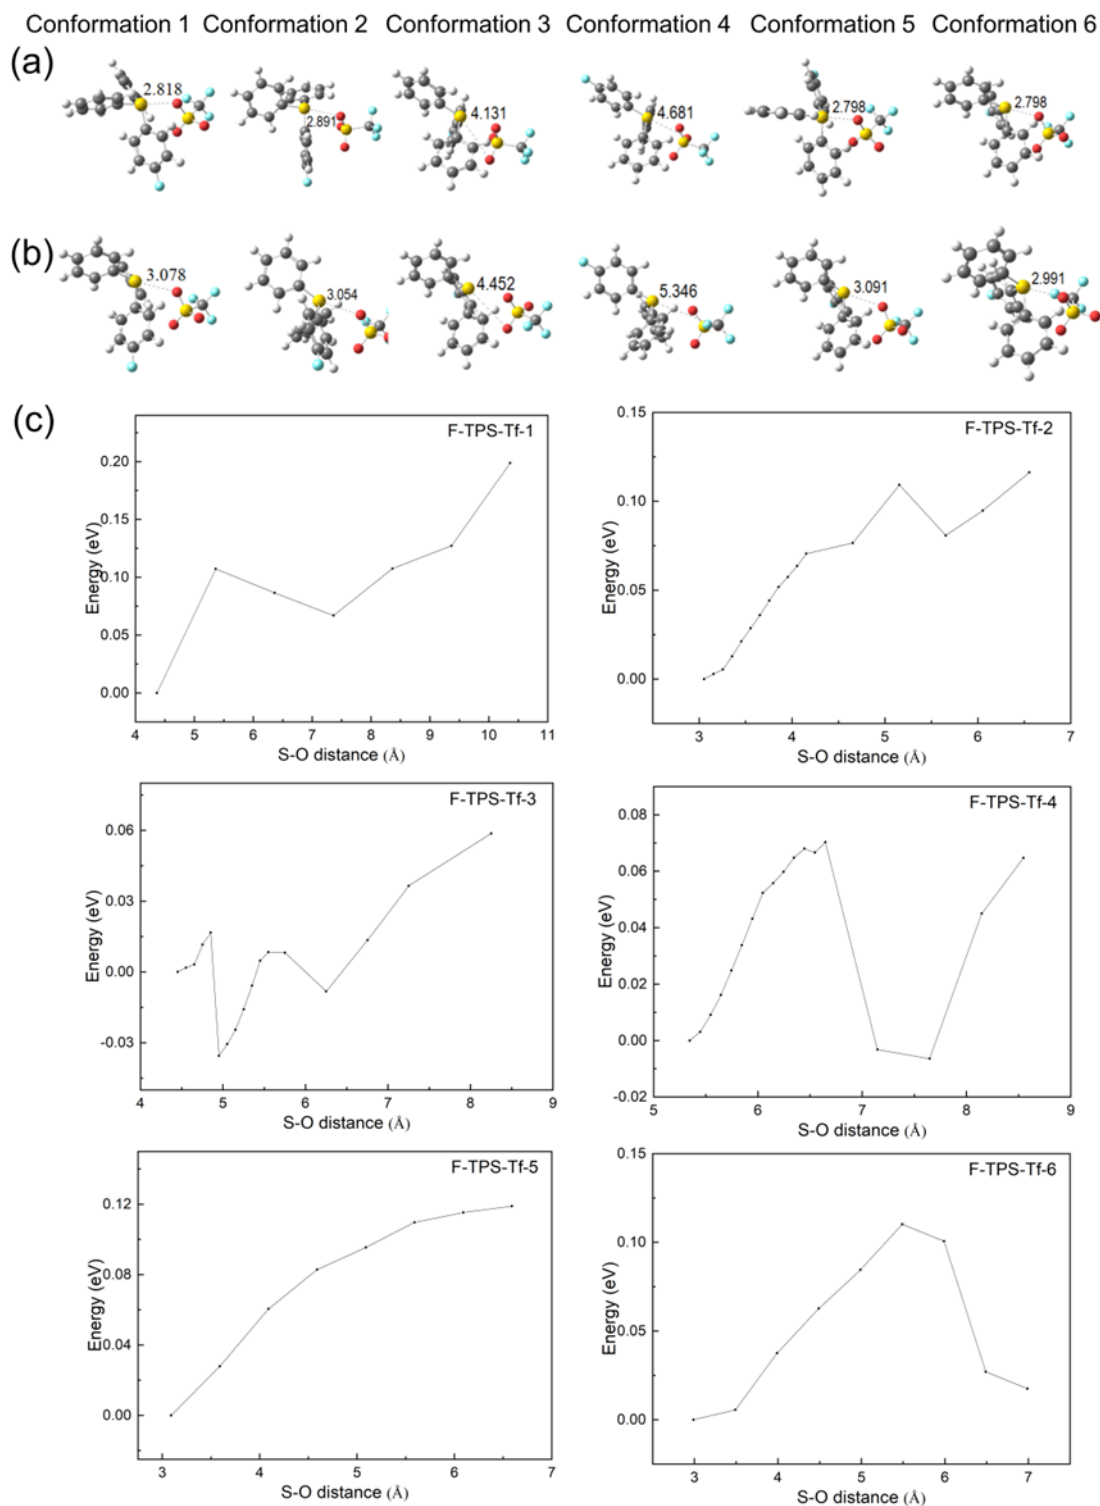

**Figure S5.** (a) The six different conformations of F-TPS-Tf before secondary electron attachment. (b) The six different conformations of F-TPS-Tf after secondary electron attachment. (c) The potential energy as a function of the S-O bond length for the six different conformations of F-TPS-Tf after secondary electron attachment.

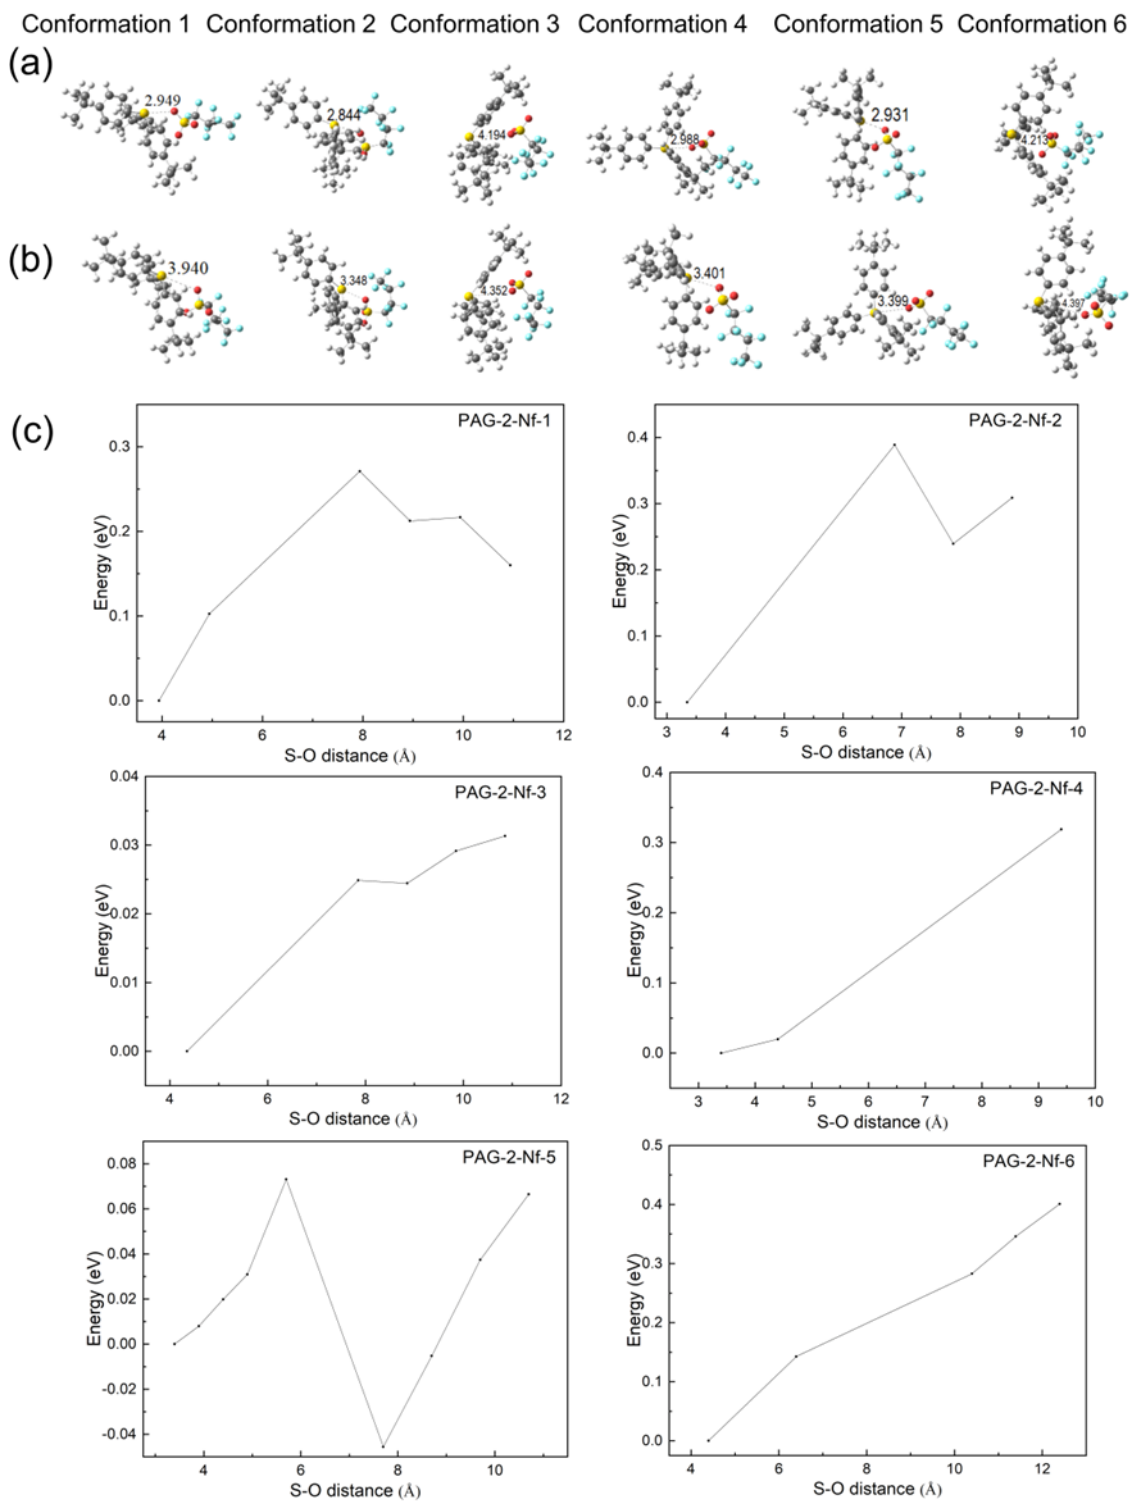

**Figure S6.** (a) The six different conformations of PAG-2-Nf before secondary electron attachment. (b) The six different conformations of PAG-2-Nf after secondary electron attachment. (c) The potential energy as a function of the S-O bond length for the six different conformations of PAG-2-Nf after secondary electron attachment.

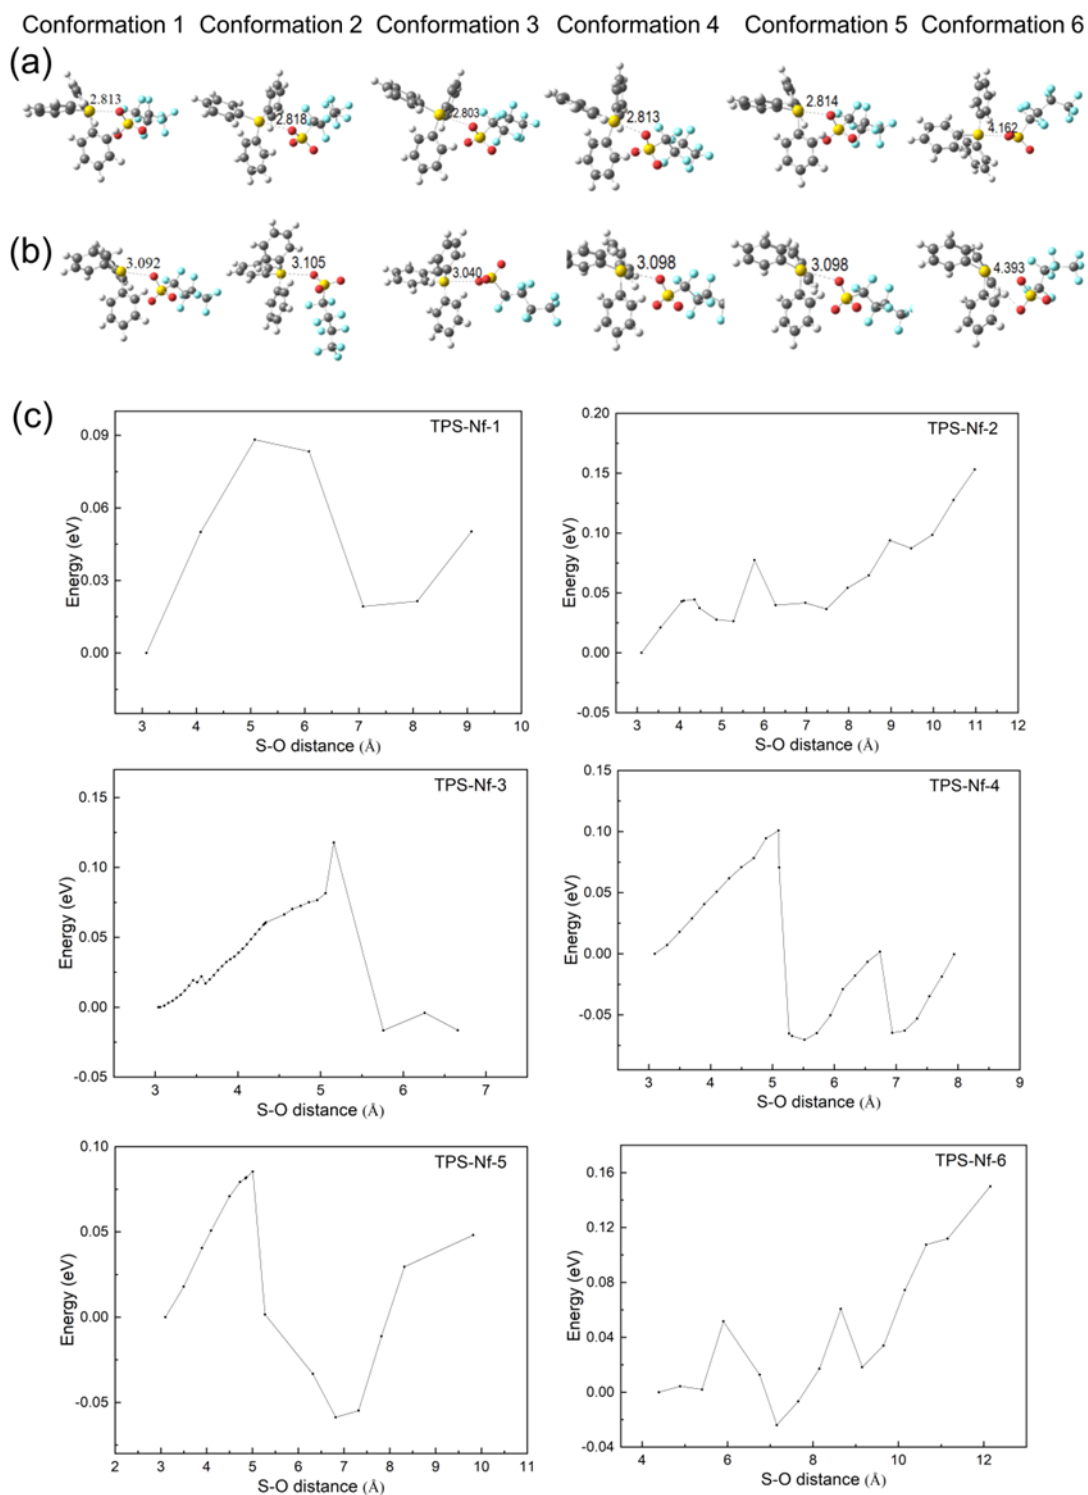

**Figure S7.** (a) The six different conformations of TPS-Nf before secondary electron attachment. (b) The six different conformations of TPS-Nf after secondary electron attachment. (c) The potential energy as a function of the S-O bond length for the six different conformations of TPS-Nf after secondary electron attachment.

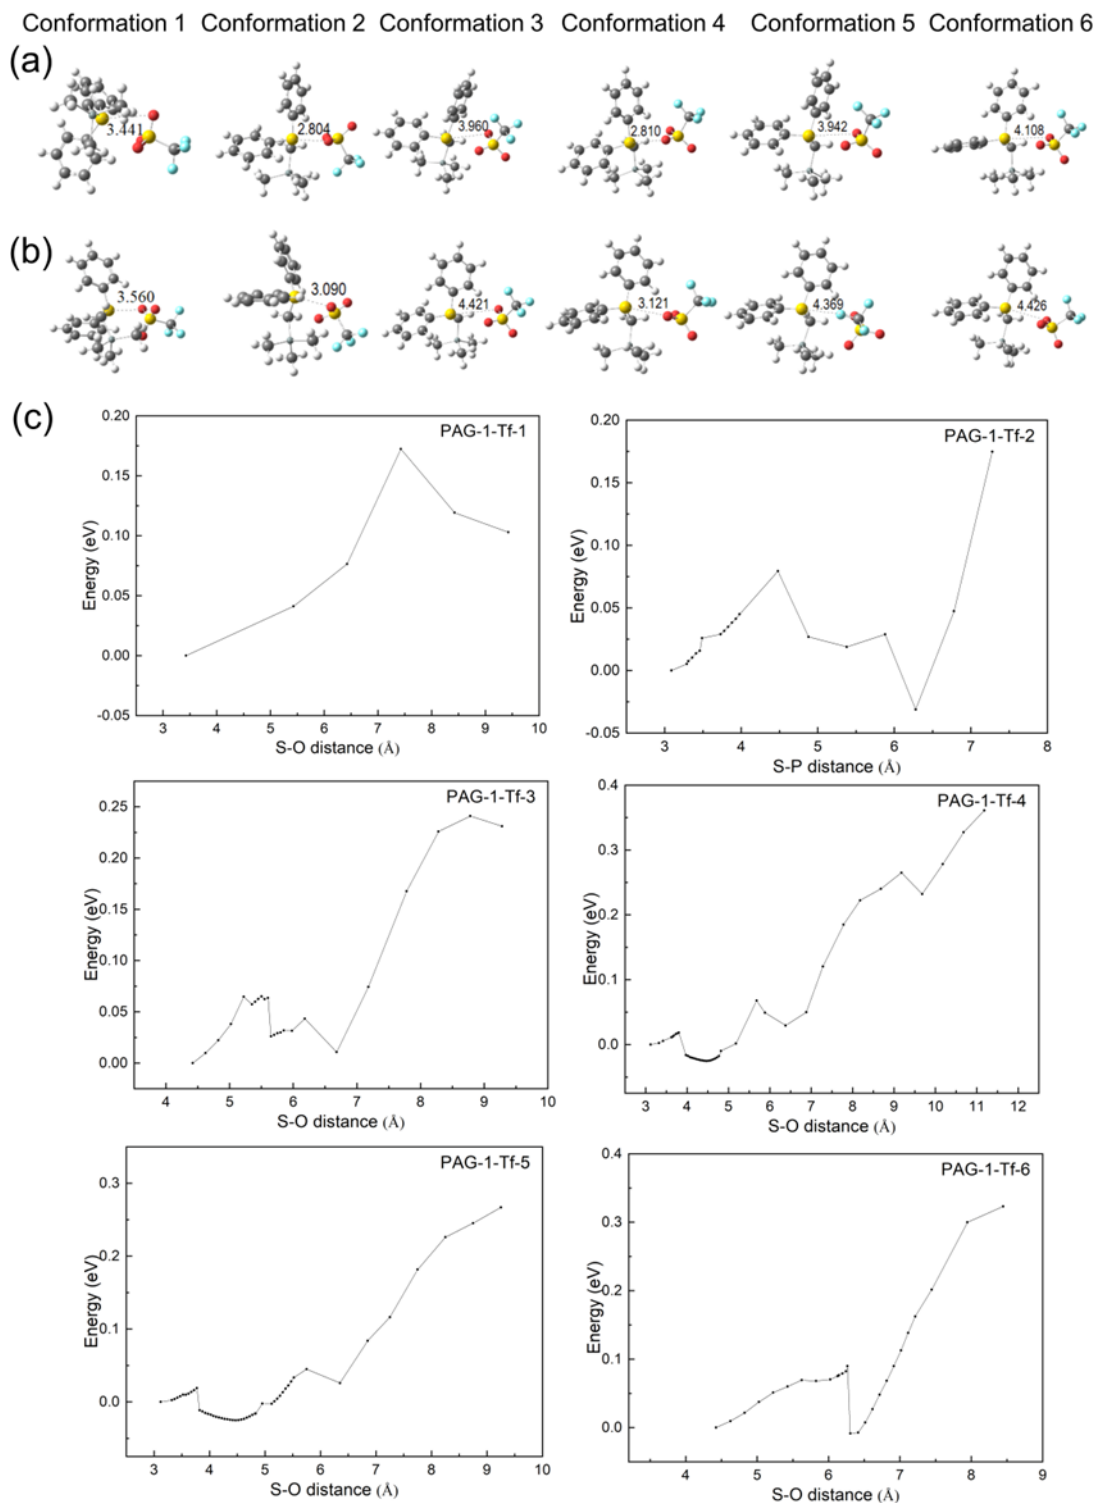

**Figure S8.** (a) The six different conformations of PAG-1-Tf before secondary electron attachment. (b) The six different conformations of PAG-1-Tf after secondary electron attachment. (c) The potential energy as a function of the S-O bond length for the six different conformations of PAG-1-Tf after secondary electron attachment.

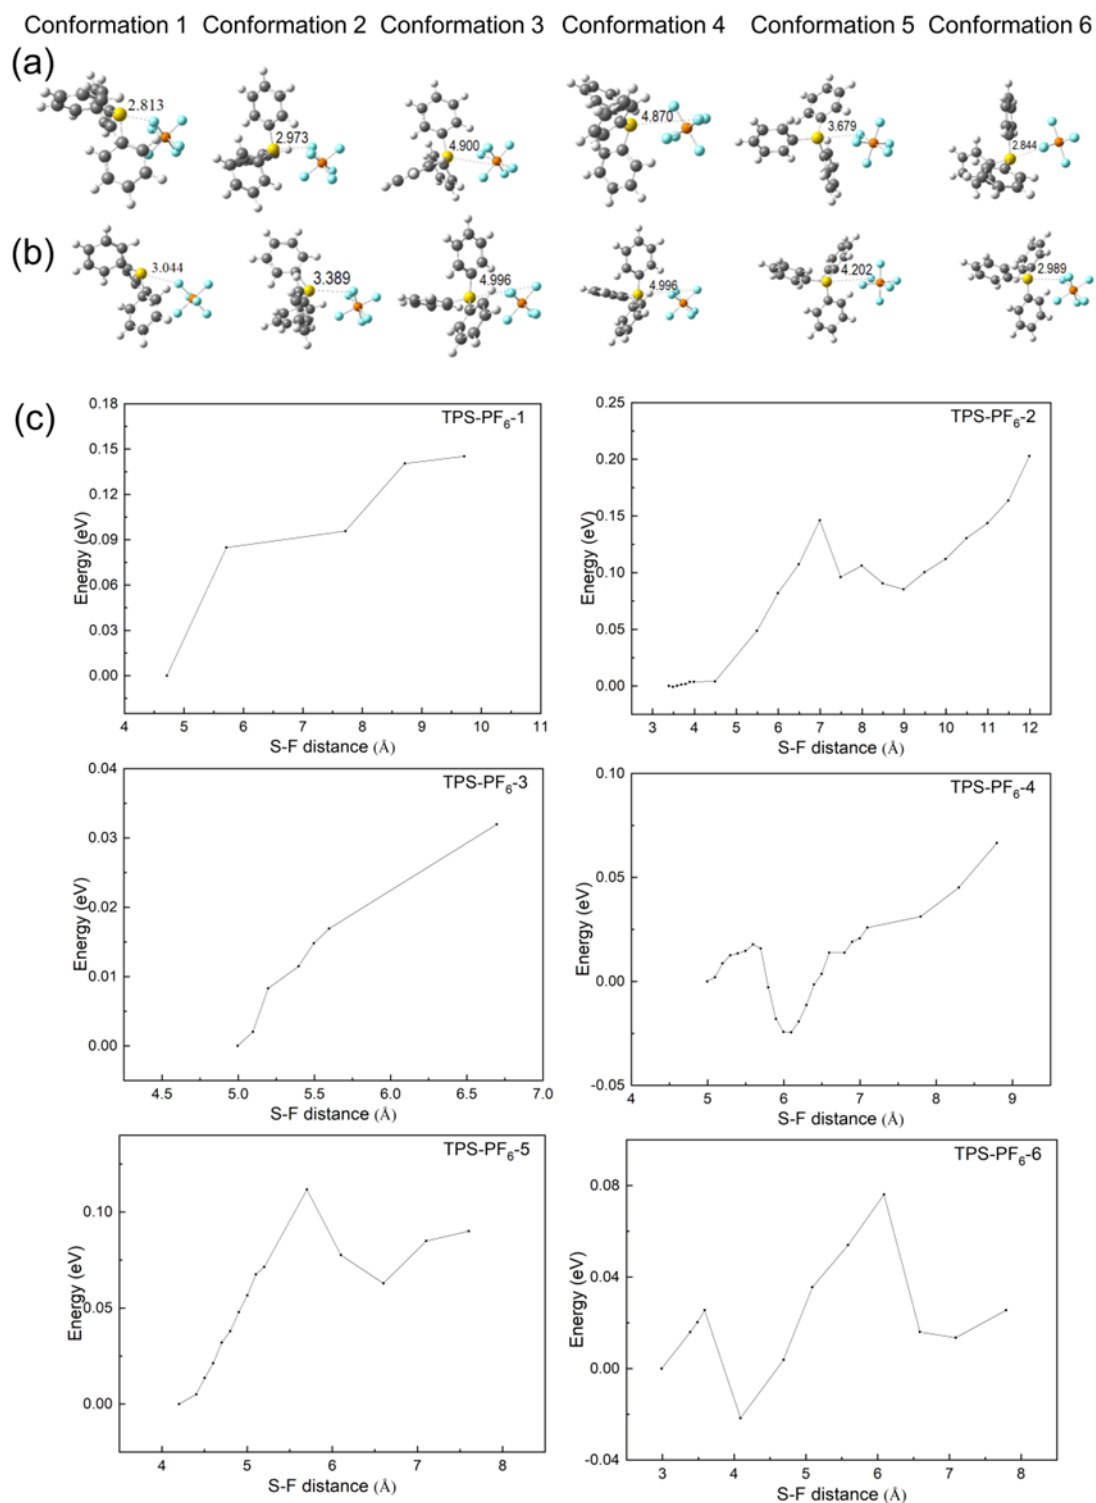

**Figure S9.** (a) The six different conformations of TPS-PF<sub>6</sub> before secondary electron attachment. (b) The six different conformations of TPS-PF<sub>6</sub> after secondary electron attachment. (c) The potential energy as a function of the S-F bond length for the six different conformations of TPS-PF<sub>6</sub> after secondary electron attachment.

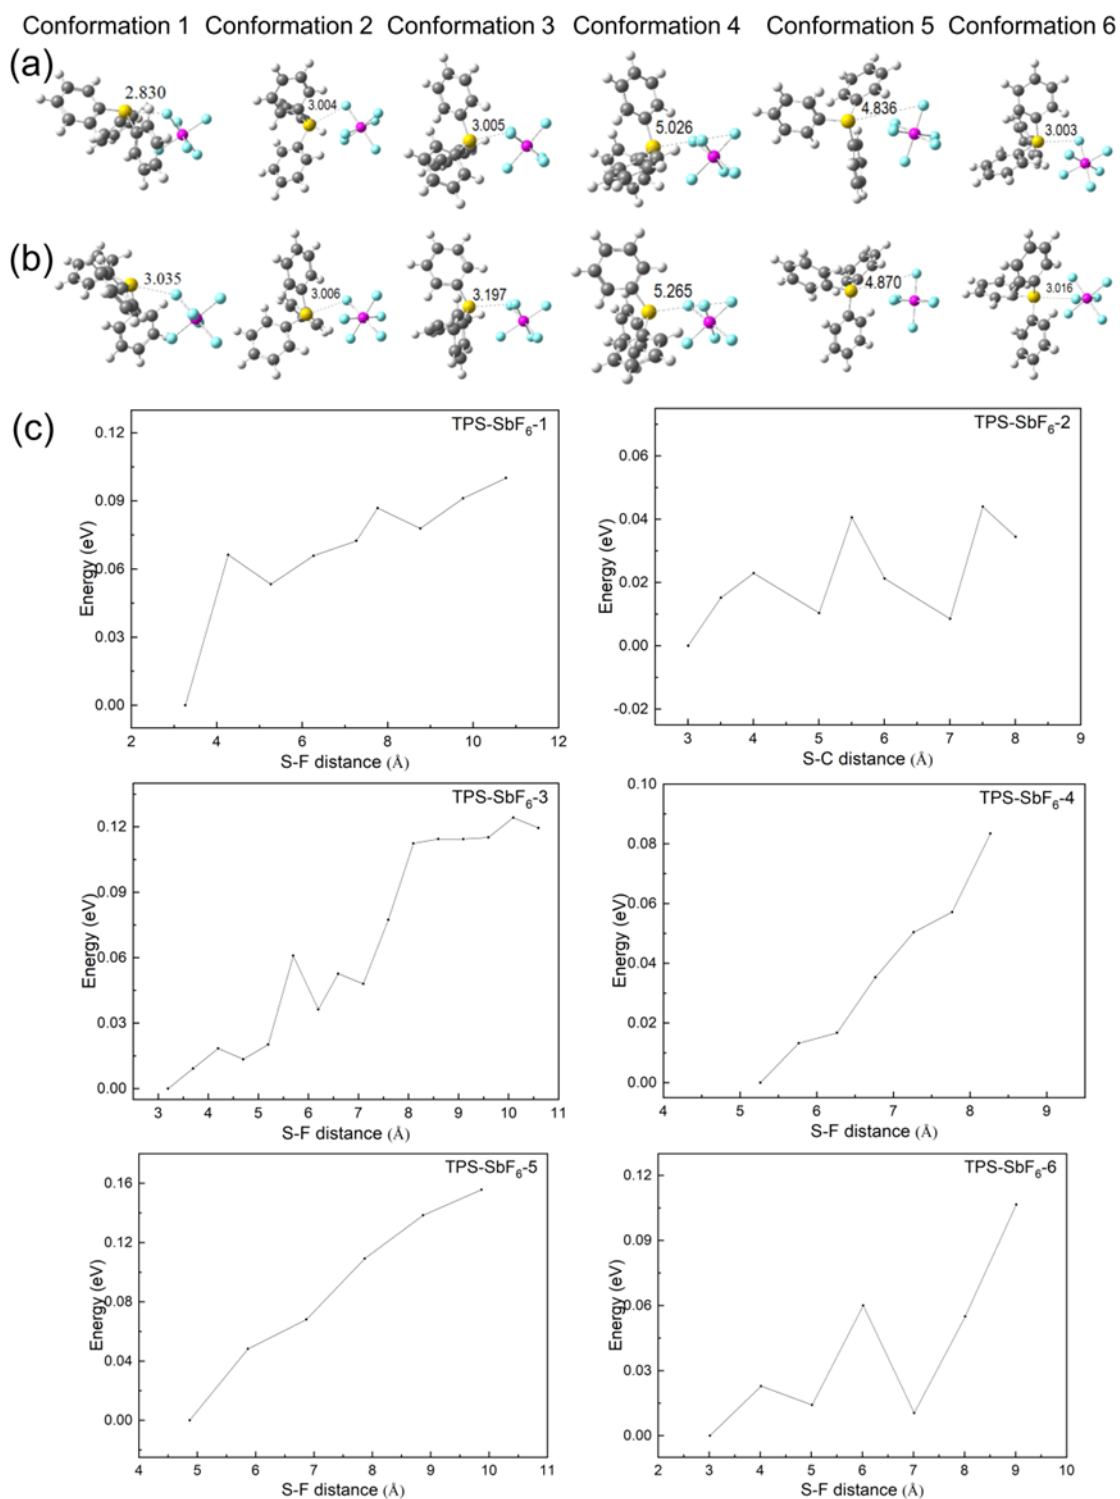

**Figure S10.** (a) The six different conformations of TPS-SbF<sub>6</sub> before secondary electron attachment. (b) The six different conformations of TPS-SbF<sub>6</sub> after secondary electron attachment. (c) The potential energy as a function of the S-F bond length for the six different conformations of TPS-SbF<sub>6</sub> after secondary electron attachment.



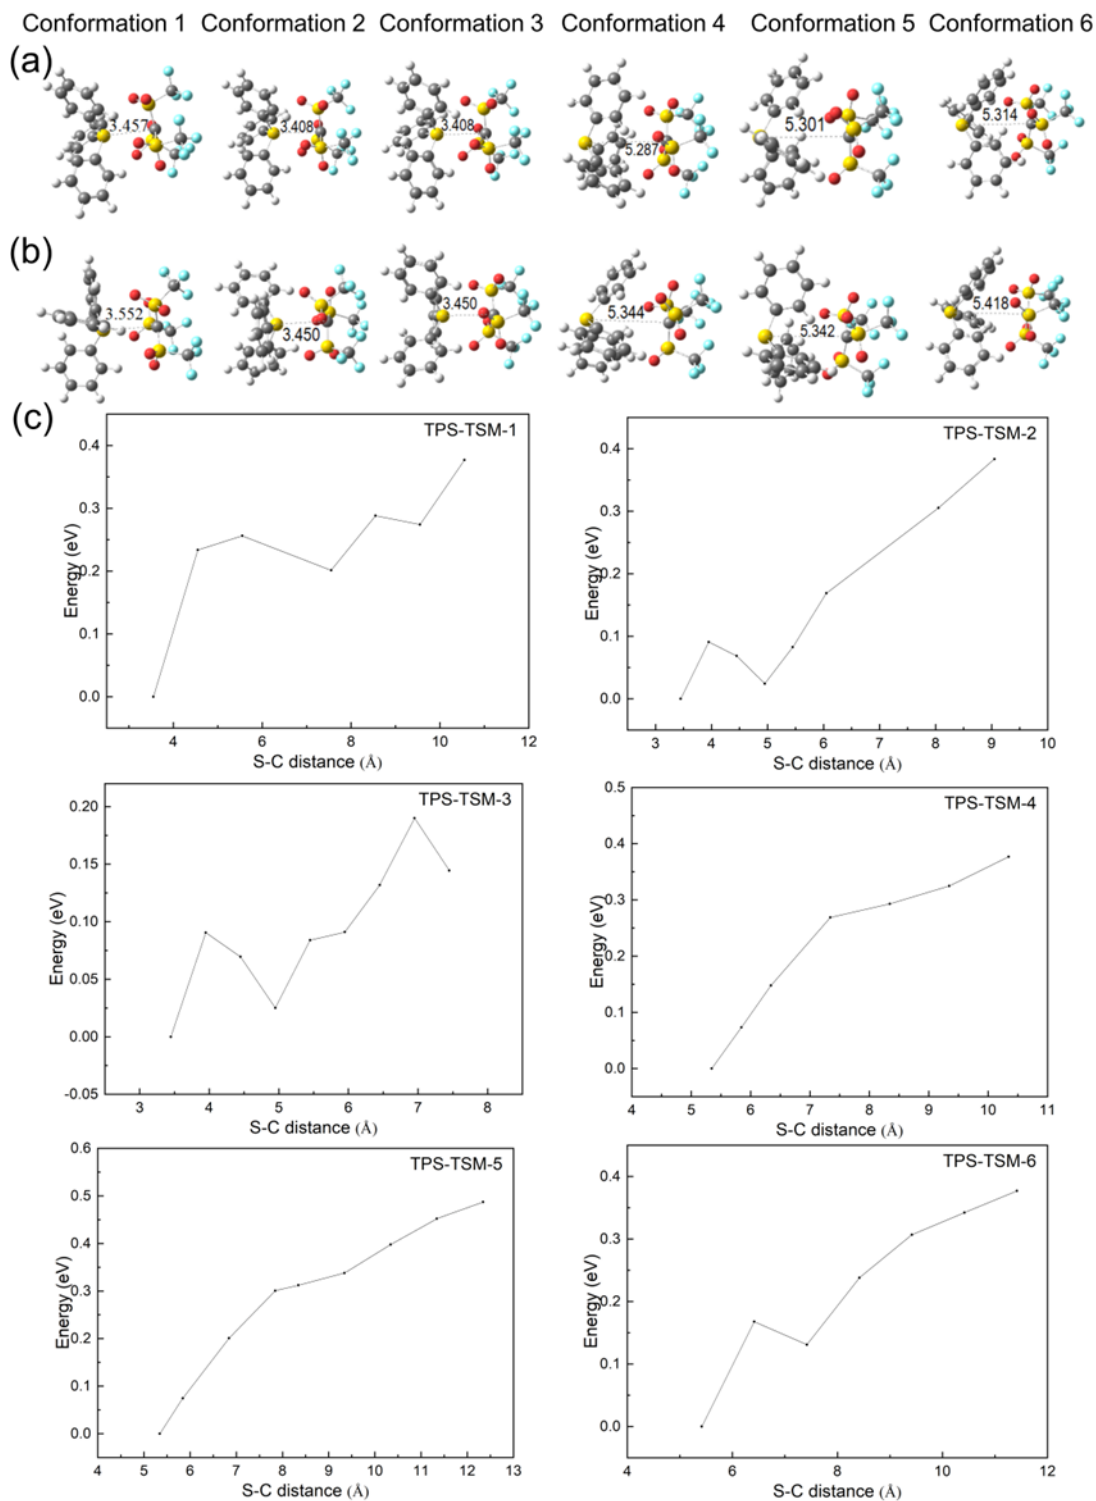

**Figure S11.** (a) The six different conformations of TPS-TSM before secondary electron attachment. (b) The six different conformations of TPS-TSM after secondary electron attachment. (c) The potential energy as a function of the S-C bond length for the six different conformations of TPS-TSM after secondary electron attachment.

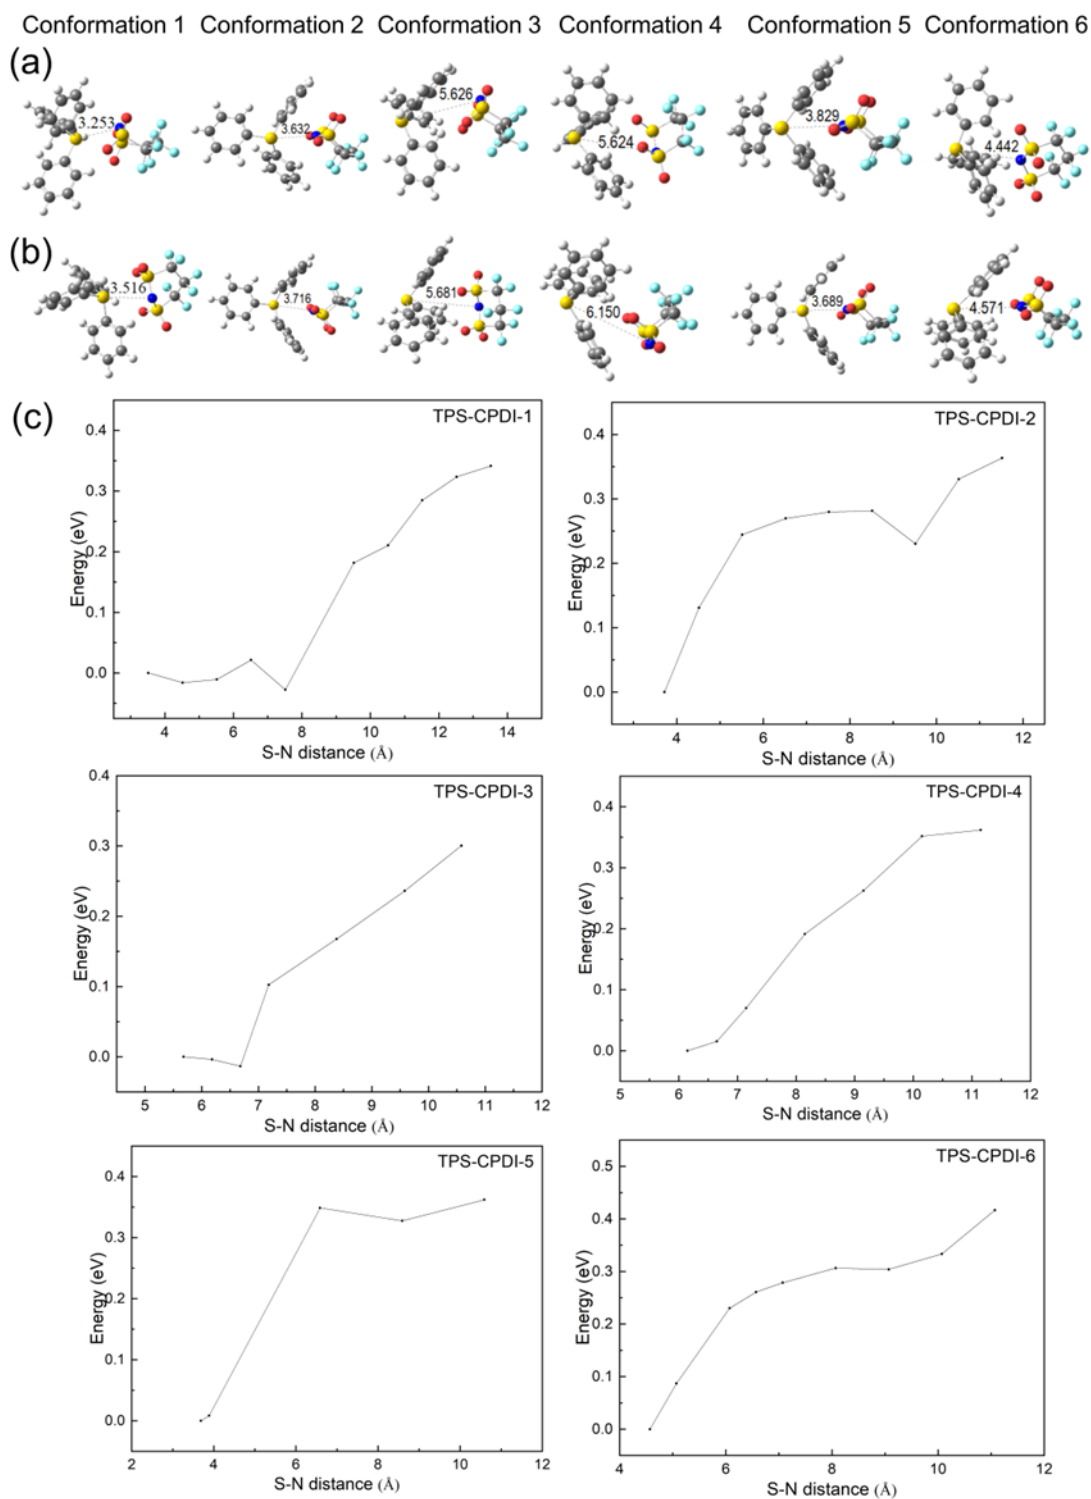

**Figure S12.** (a) The six different conformations of TPS-CPDI before secondary electron attachment. (b) The six different conformations of TPS-CPDI after secondary electron attachment. (c) The potential energy as a function of the S-N bond length for the six different conformations of TPS-CPDI after secondary electron attachment.

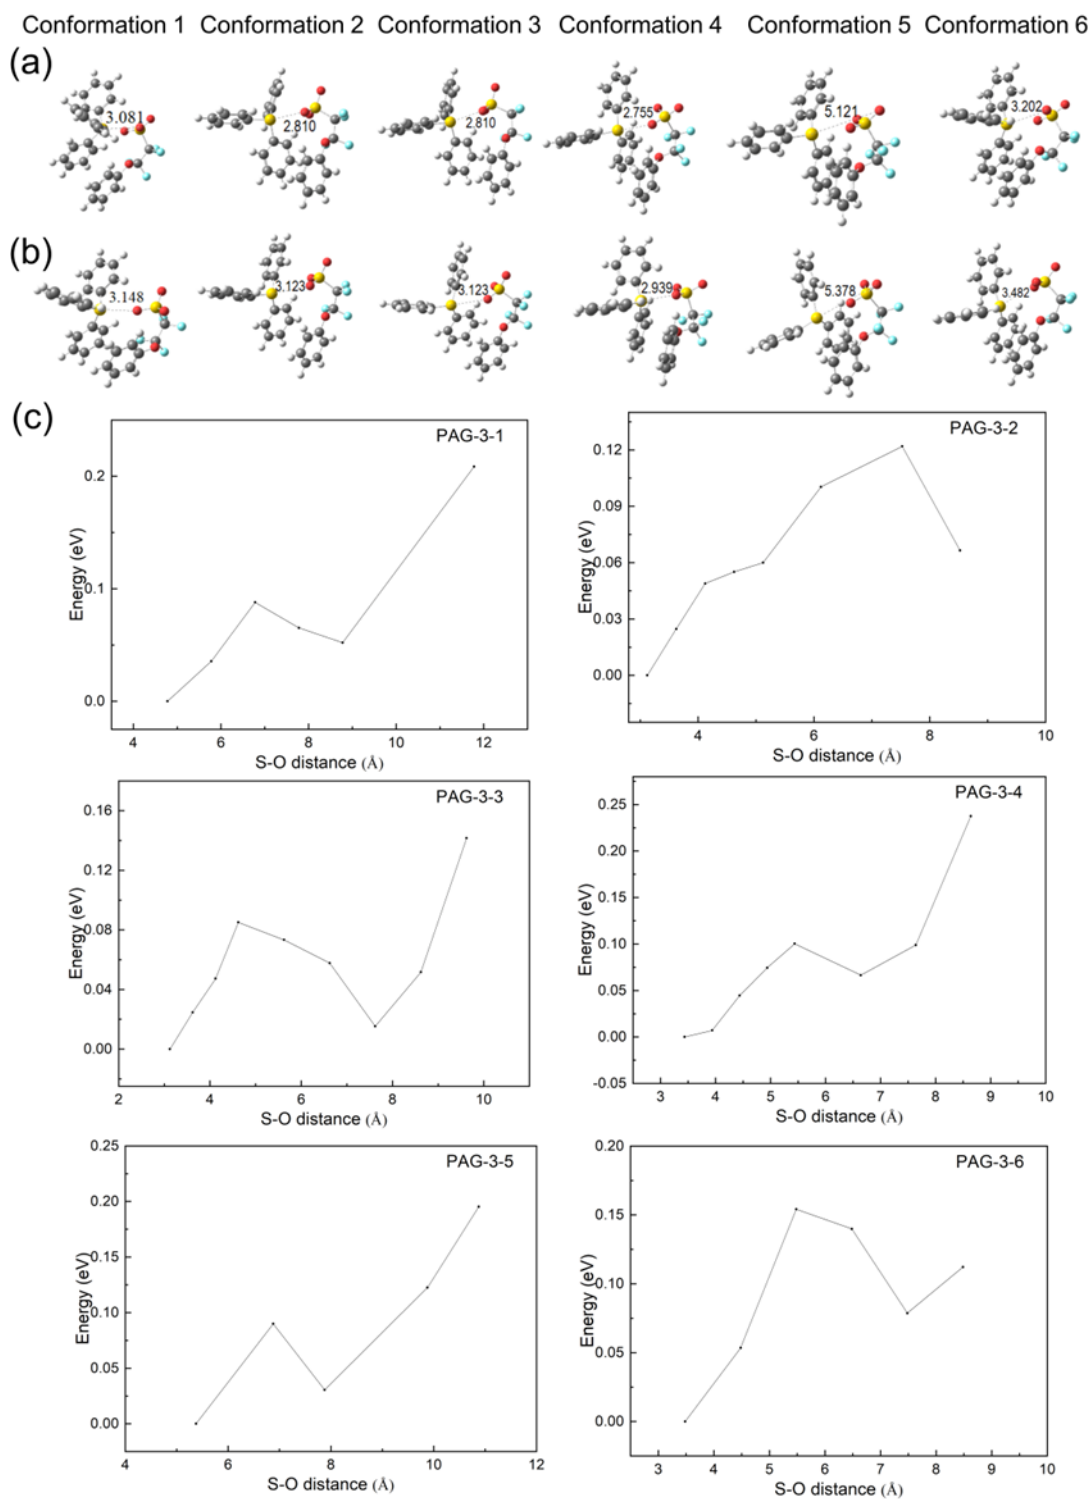

**Figure S13.** (a) The six different conformations of PAG-3 before secondary electron attachment. (b) The six different conformations of PAG-3 after secondary electron attachment. (c) The potential energy as a function of the S-O bond length for the six different conformations of PAG-3 after secondary electron attachment.

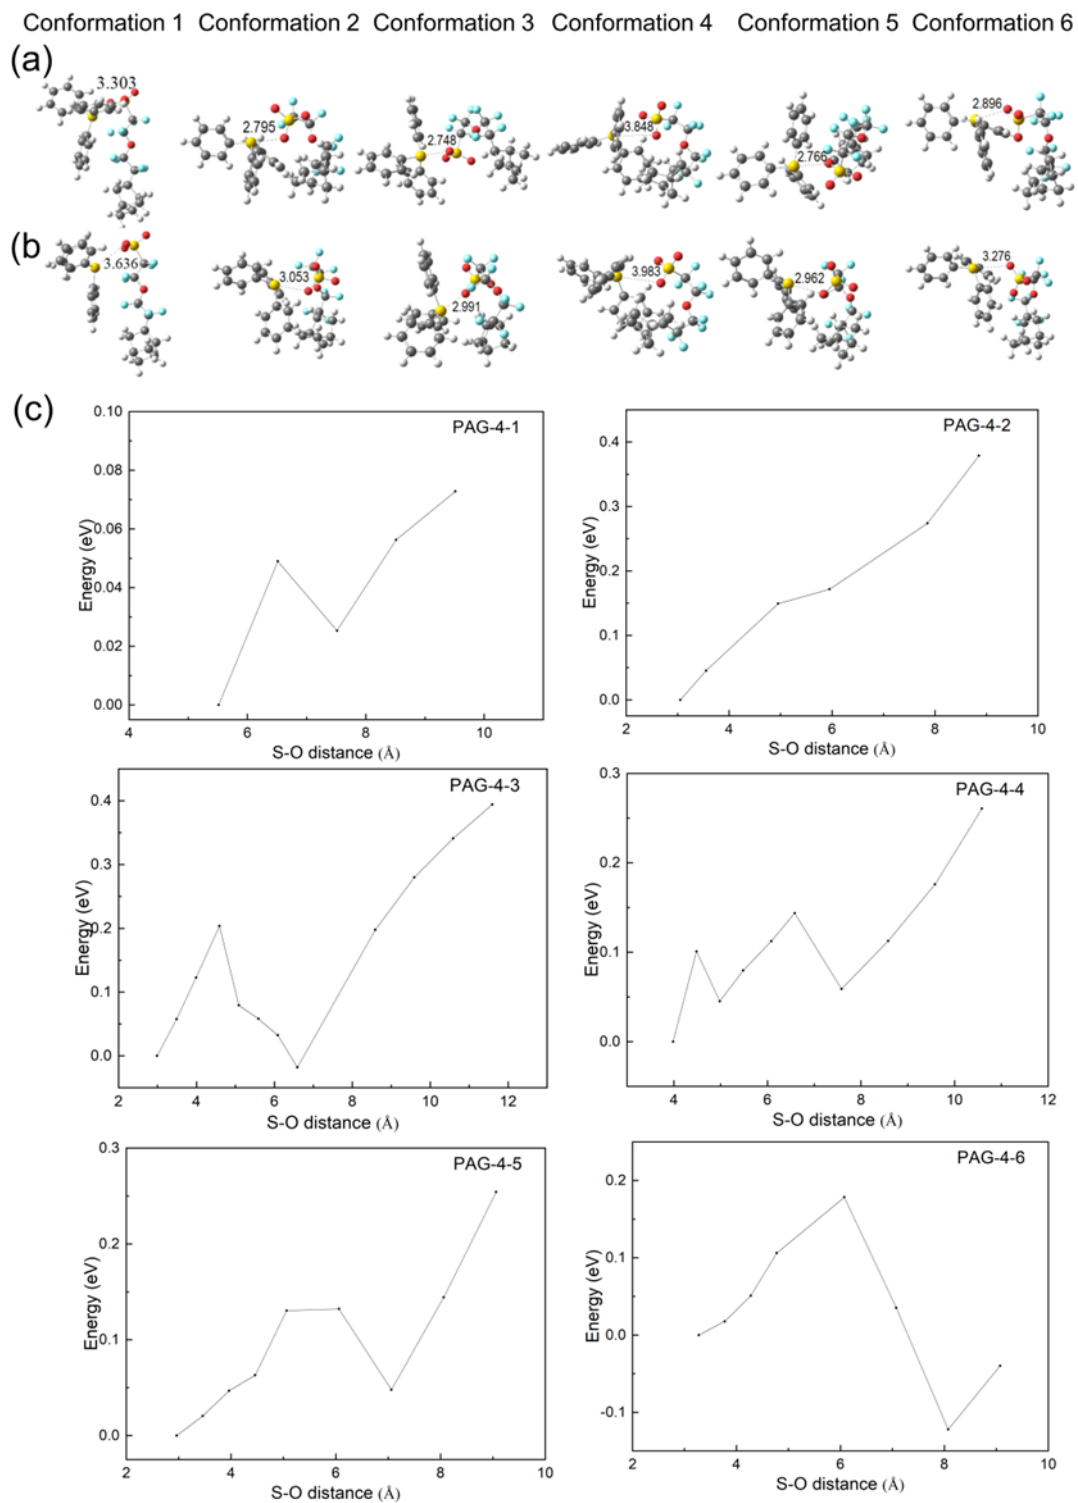

**Figure S14.** (a) The six different conformations of PAG-4 before secondary electron attachment. (b) The six different conformations of PAG-4 after secondary electron attachment. (c) The potential energy as a function of the S-O bond length for the six different conformations of PAG-4 after secondary electron attachment.

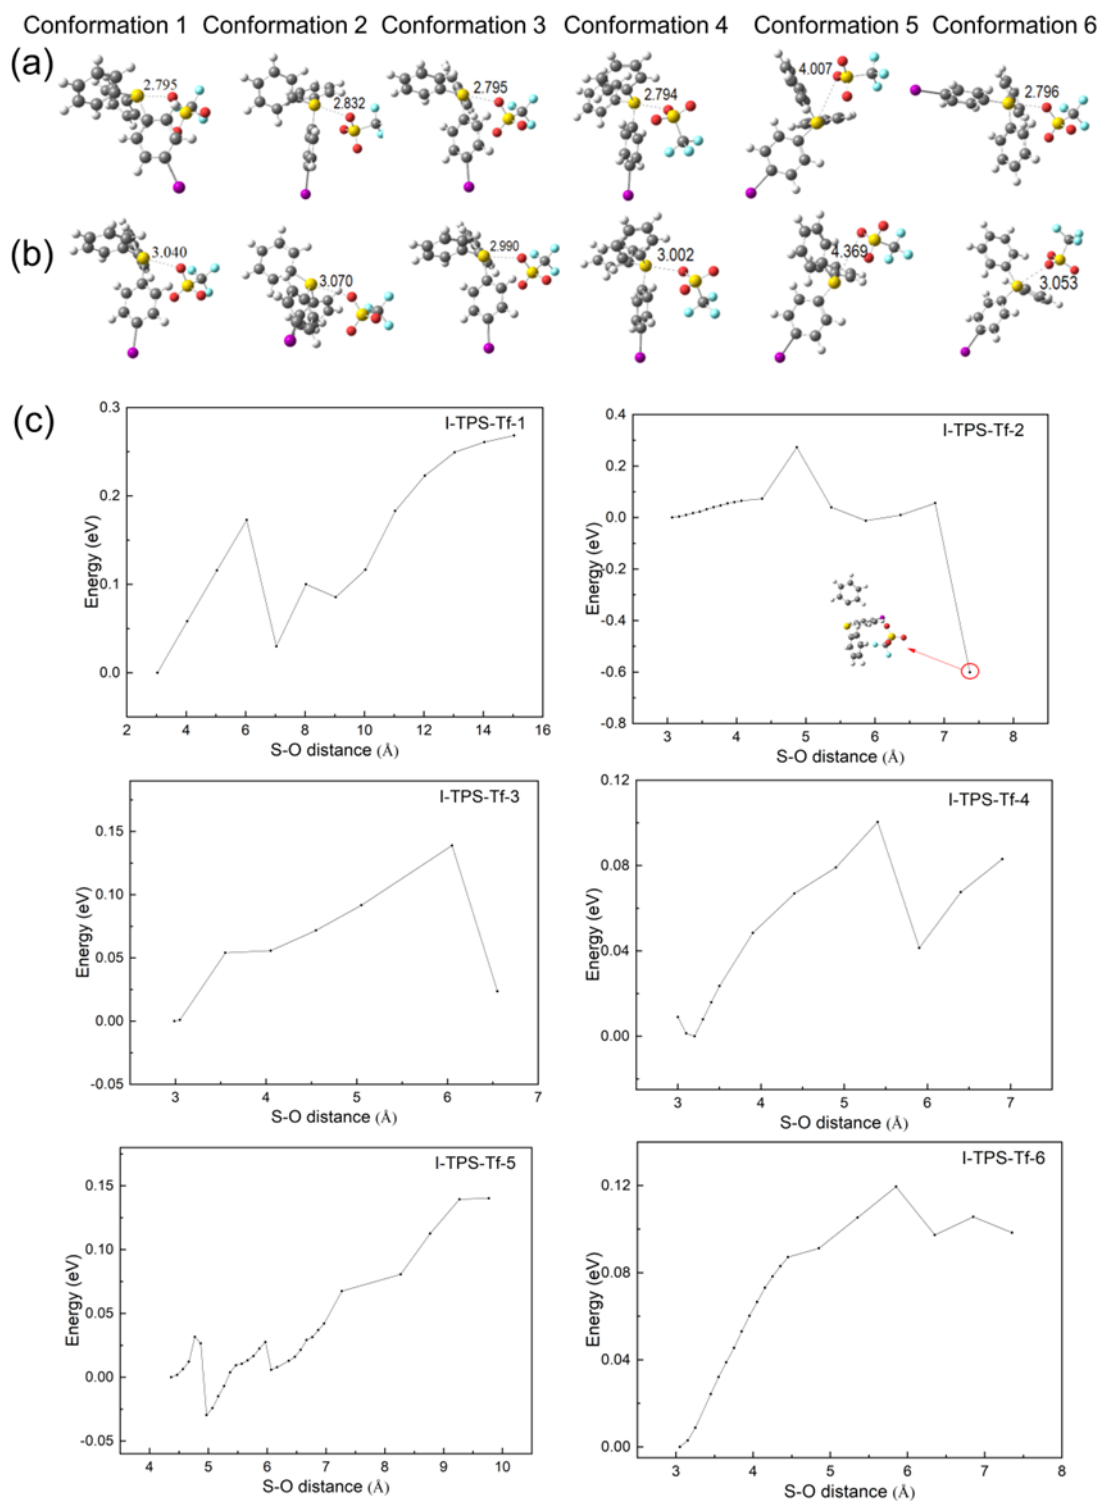

**Figure S15.** (a) The six different conformations of I-TPS-Tf before secondary electron attachment. (b) The six different conformations of I-TPS-Tf after secondary electron attachment. (c) The potential energy as a function of the S-O bond length for the six different conformations of I-TPS-Tf after secondary electron attachment.

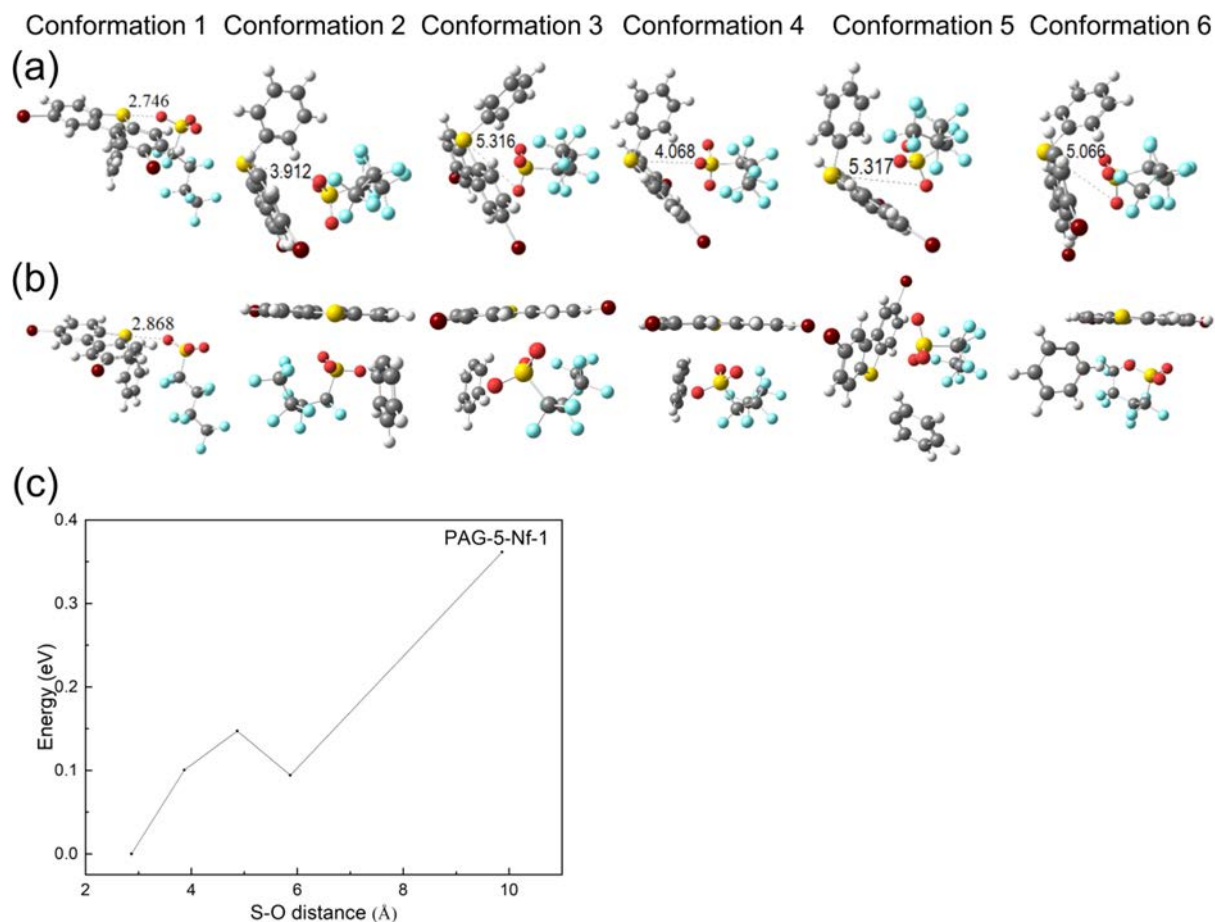

**Figure S16.** (a) The six different conformations of PAG-5-Nf before secondary electron attachment. (b) The six different conformations of PAG-5-Nf after secondary electron attachment. (c) The potential energy as a function of the S-O bond length for Configuration 1 of PAG-5-Nf after secondary electron attachment.

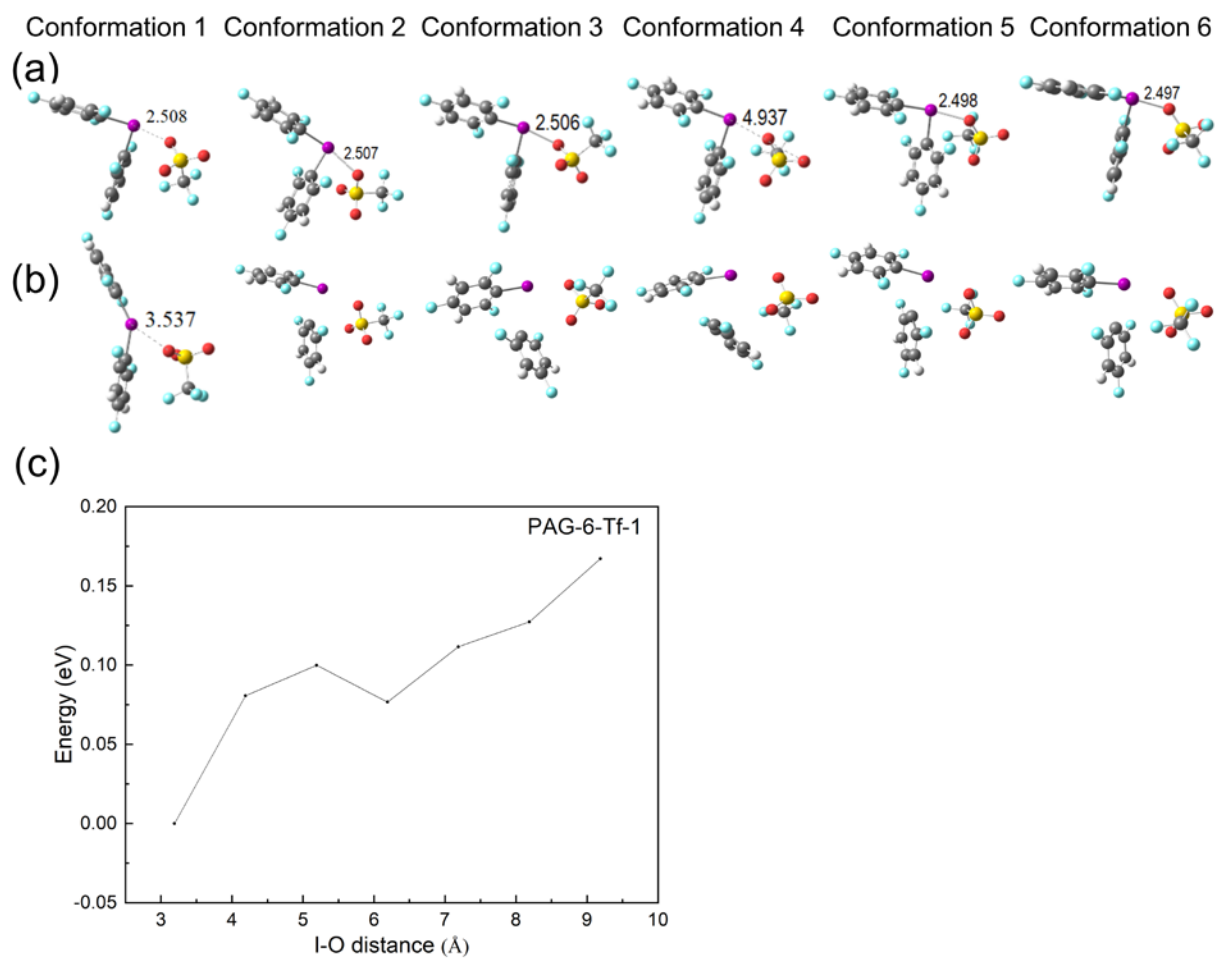

**Figure S17.** (a) The six different conformations of PAG-6-Tf before secondary electron attachment. (b) The six different conformations of PAG-6-Tf after secondary electron attachment. (c) The potential energy as a function of the I-O bond length for the Conformation 1 of PAG-6-Tf after secondary electron attachment.

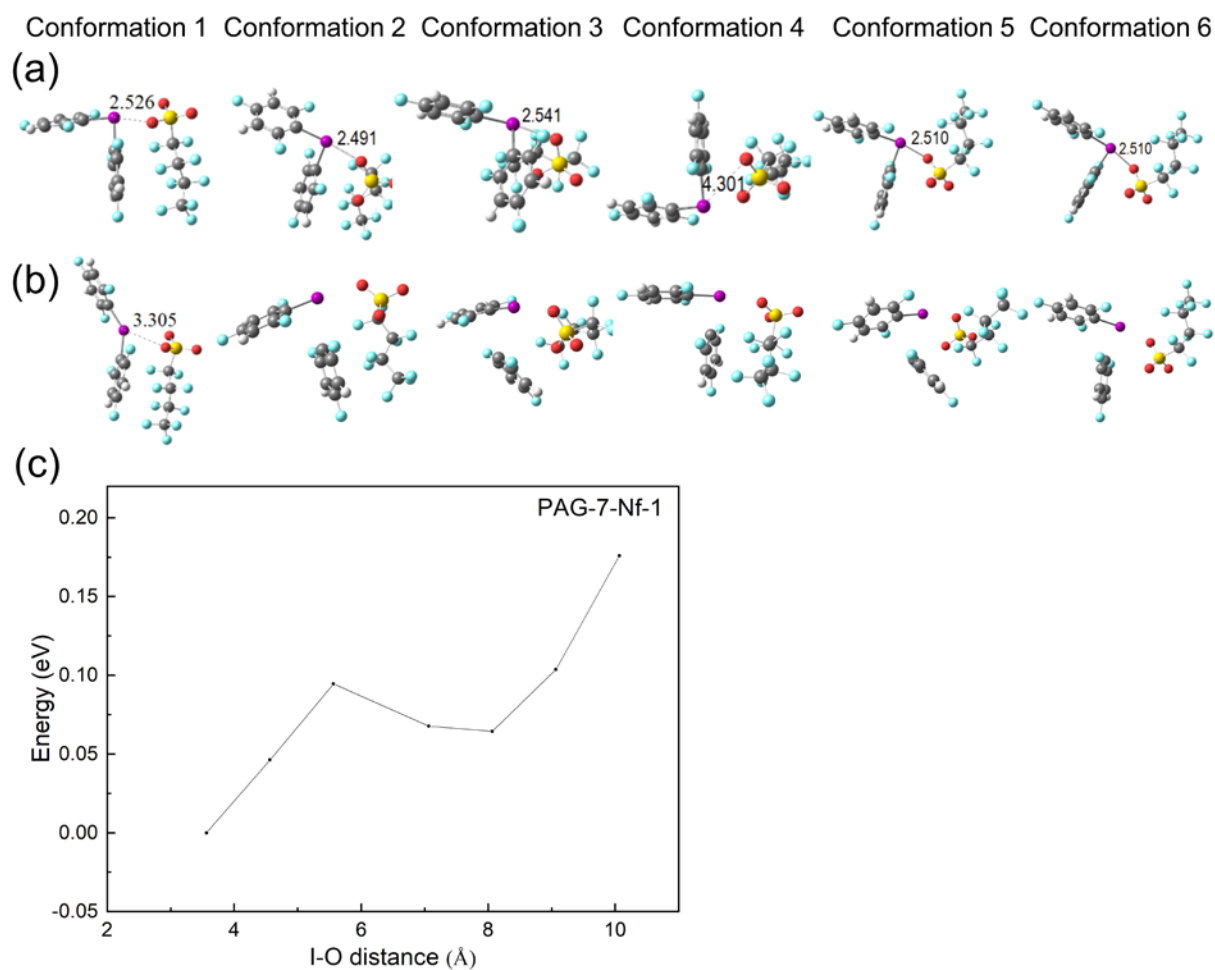

**Figure S18.** (a) The six different conformations of PAG-7-nf before secondary electron attachment. (b) The six different conformations of PAG-7-nf after secondary electron attachment. (c) The potential energy as a function of the I-O bond length for the Conformation 1 of PAG-7-Nf after secondary electron attachment.



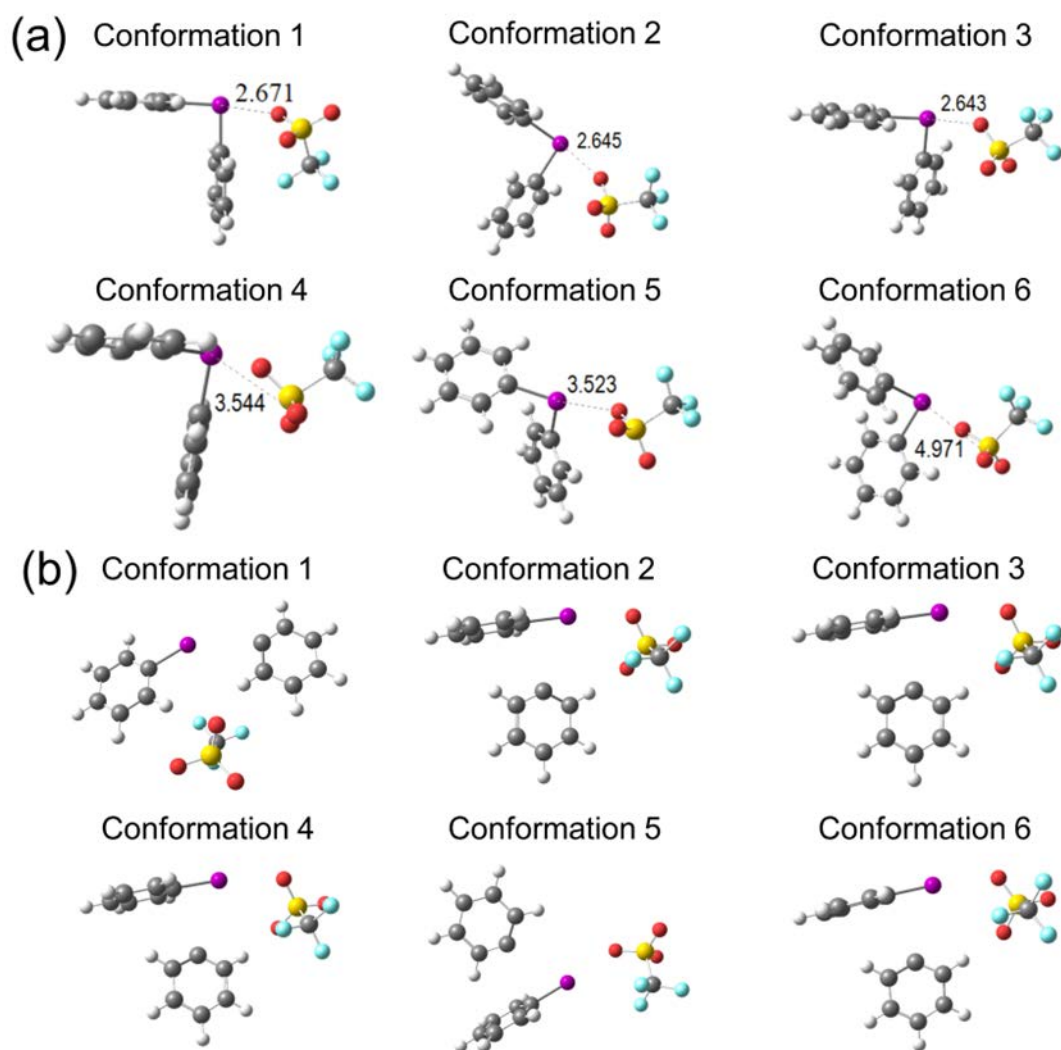

**Figure S19.** (a) The six different conformations of DPI-Tf before secondary electron attachment. (b) The six different conformations of DPI-Tf after secondary electron attachment.

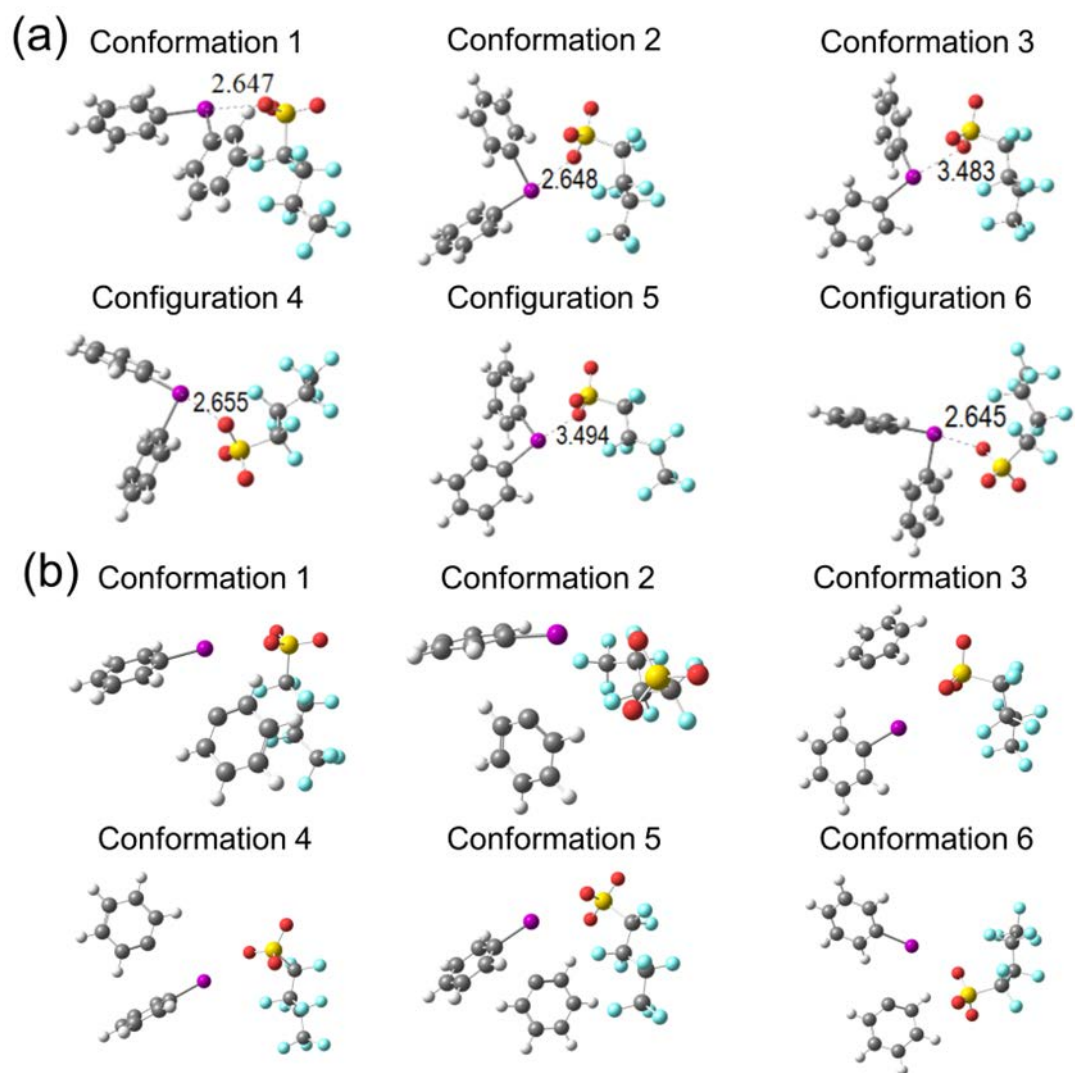

**Figure S20.** (a) The six different conformations of DPI-Nf before secondary electron attachment. (b) The six different conformations of DPI-Nf after secondary electron attachment.

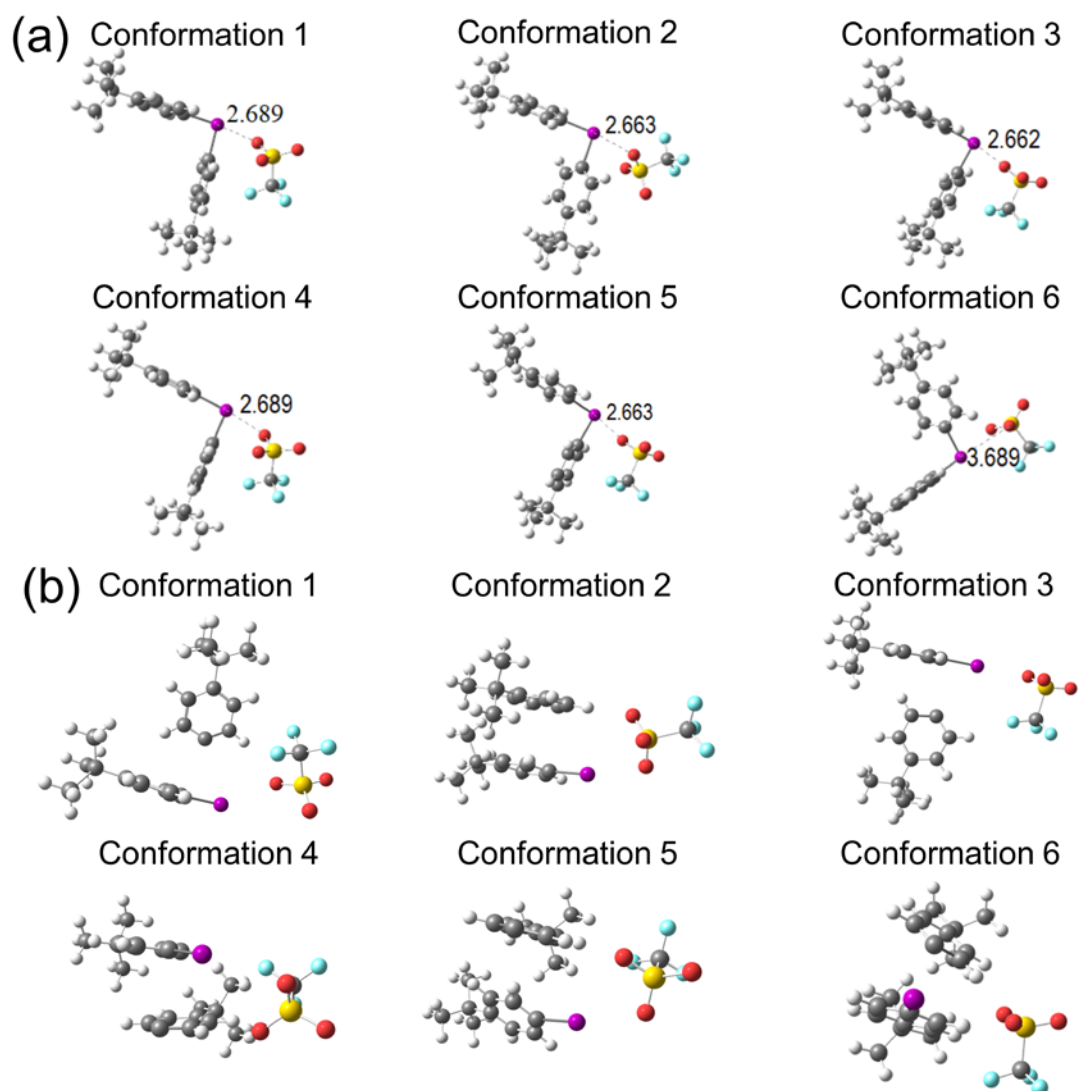

**Figure S21.** (a) The six different conformations of BBI-Tf before secondary electron attachment. (b) The six different conformations of BBI-Tf after secondary electron attachment.

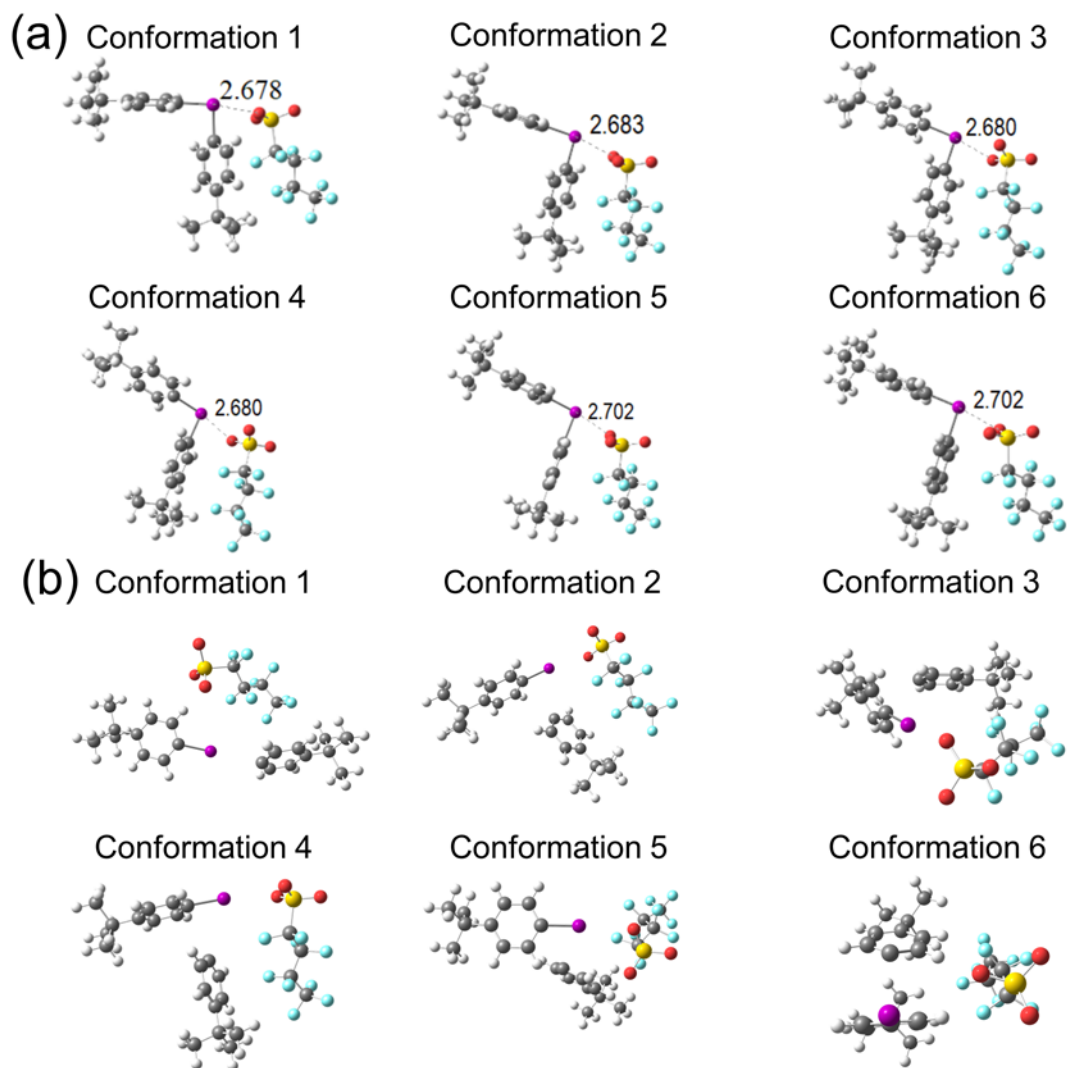

**Figure S22.** (a) The six different conformations of BBI-Nf before secondary electron attachment. (b) The six different conformations of BBI-Nf after secondary electron attachment.

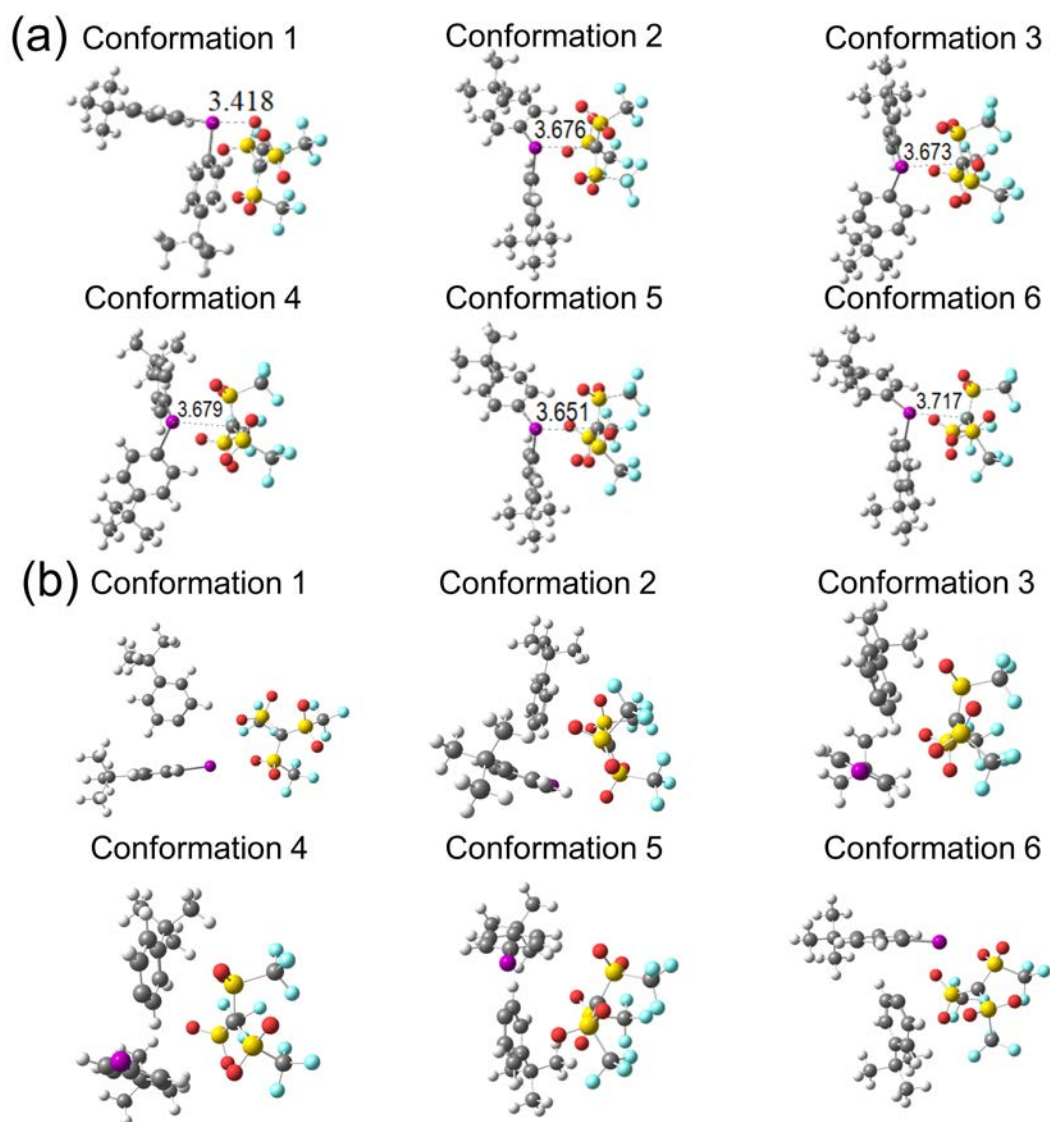

**Figure S23.** (a) The six different conformations of BBI-TSM before secondary electron attachment. (b) The six different conformations of BBI-TSM after secondary electron attachment.

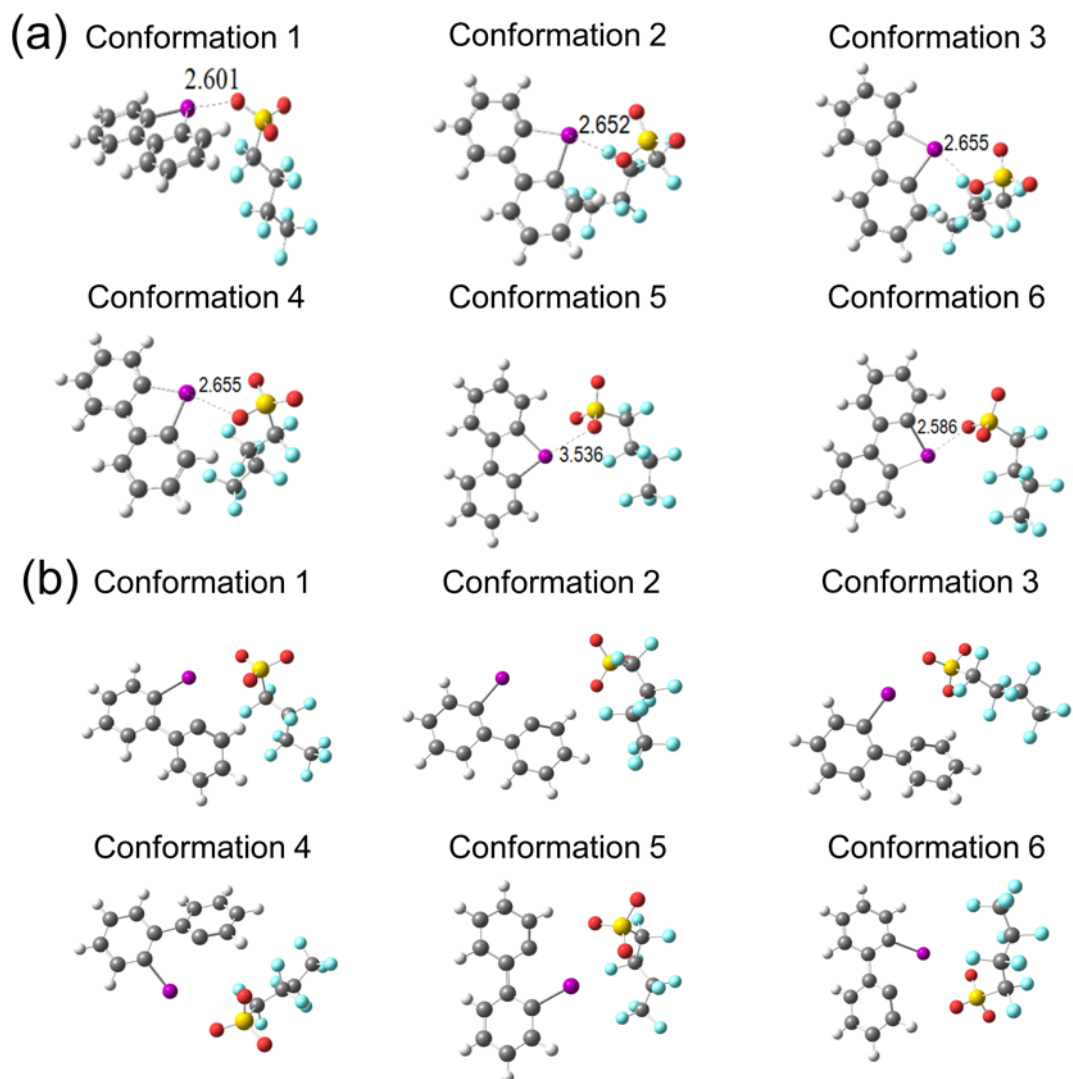

**Figure S24.** (a) The six different conformations of PAG-8-Nf before secondary electron attachment. (b) The six different conformations of PAG-8-Nf after secondary electron attachment.

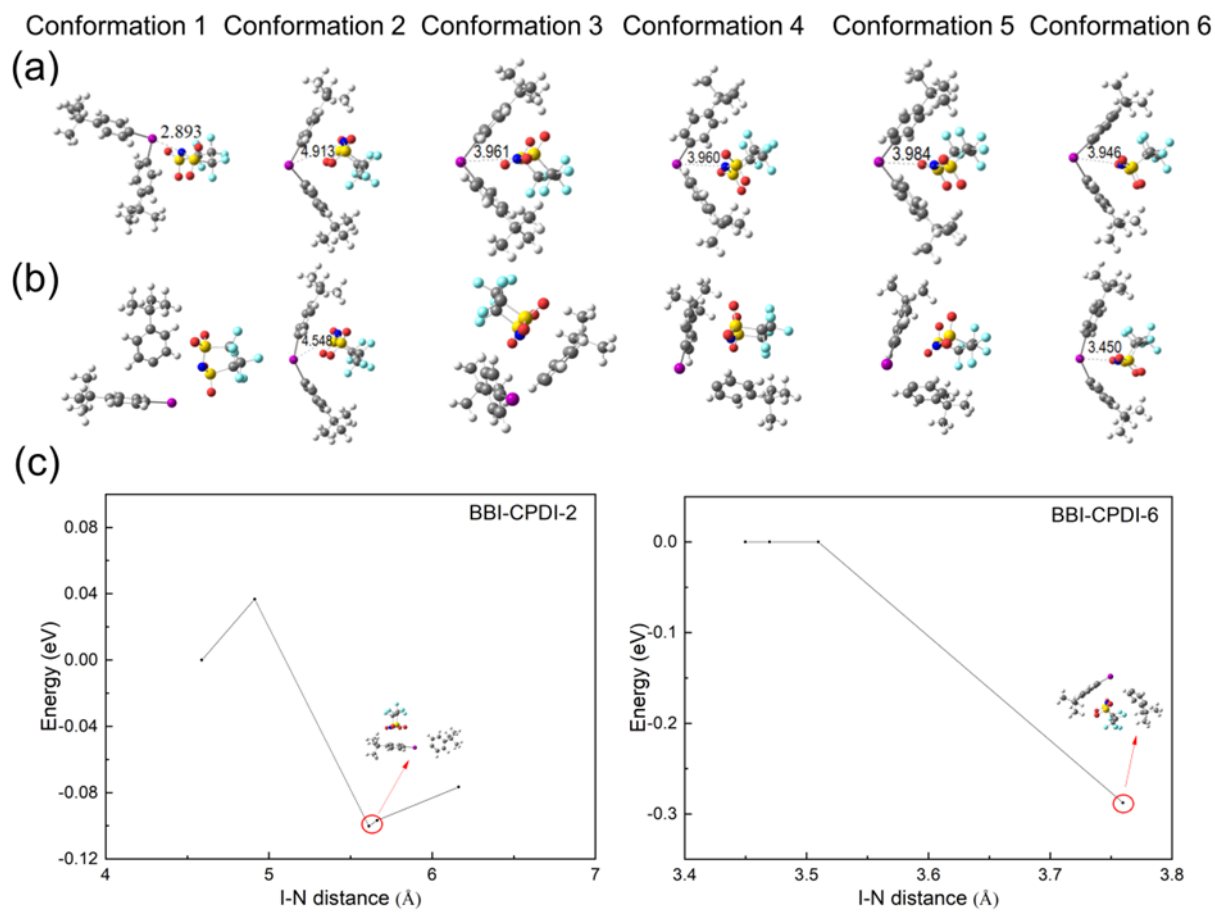

**Figure S25.** (a) The six different conformations of BBI-CPDI before secondary electron attachment. (b) The six different conformations of BBI-CPDI after secondary electron attachment. (c) The potential energy as a function of the I-N bond length for the Conformation 2 and Conformation 6 of BBI-CPDI after secondary electron attachment.

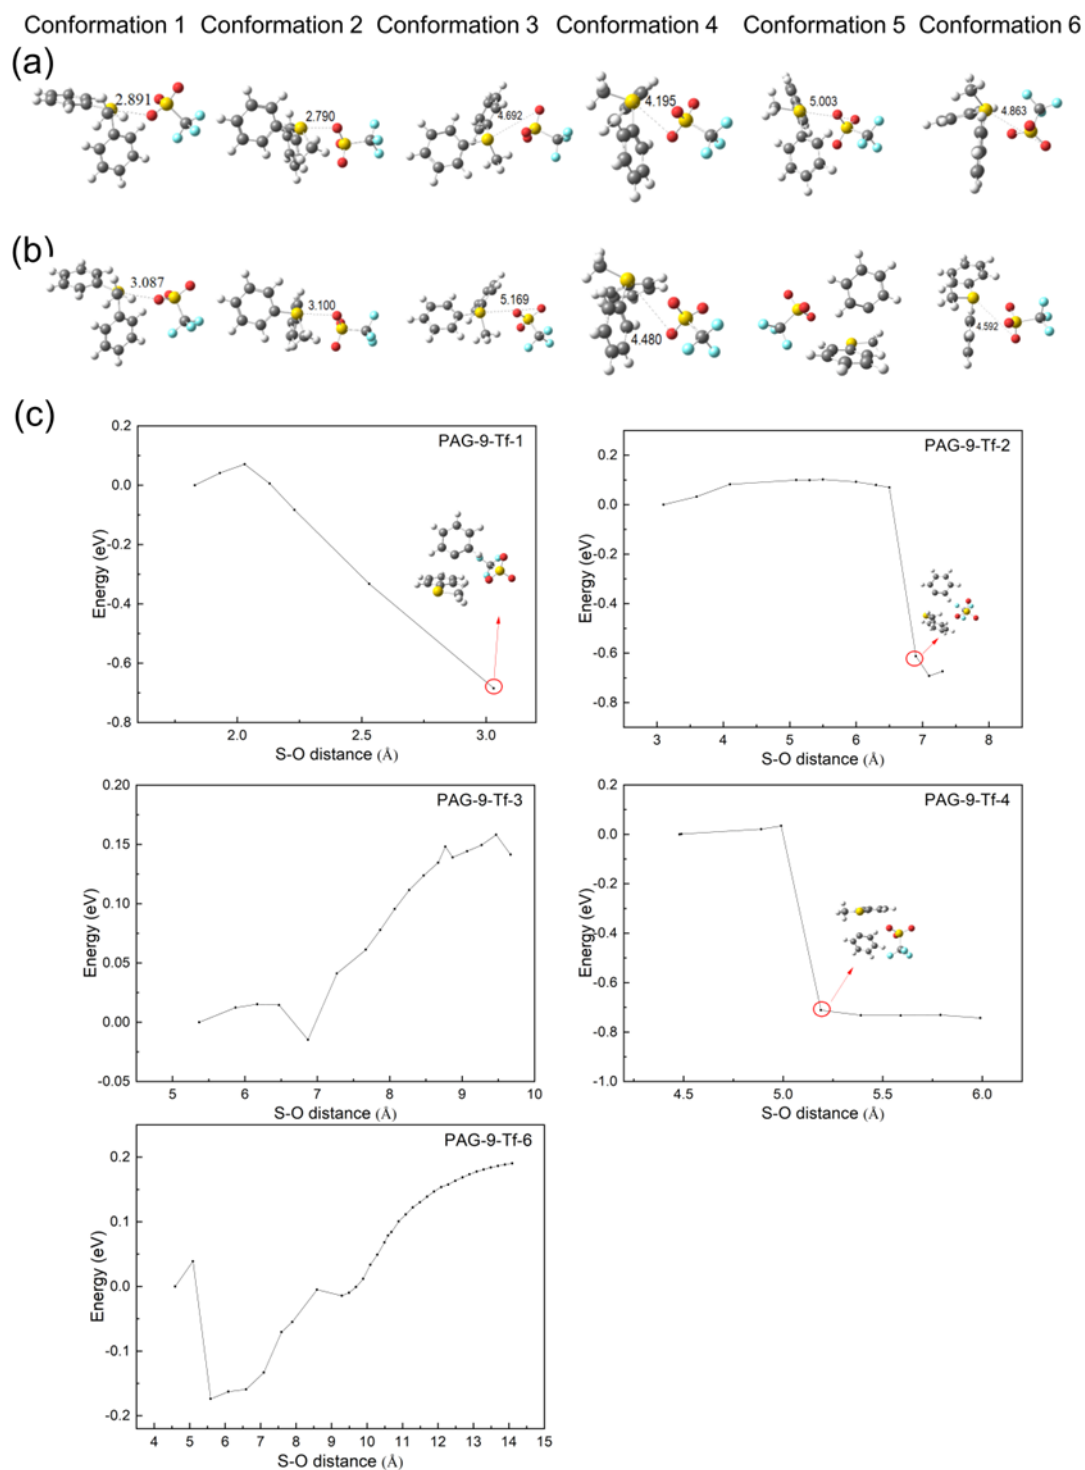

**Figure S26.** (a) The six different conformations of PAG-9-Tf before secondary electron attachment. (b) The six different conformations of PAG-9-Tf after secondary electron attachment. (c) The potential energy as a function of the S-O bond length for the Conformation 1, Conformation 2, Conformation 3, Conformation 4, and Conformation 6 of PAG-9-Tf after secondary electron attachment.



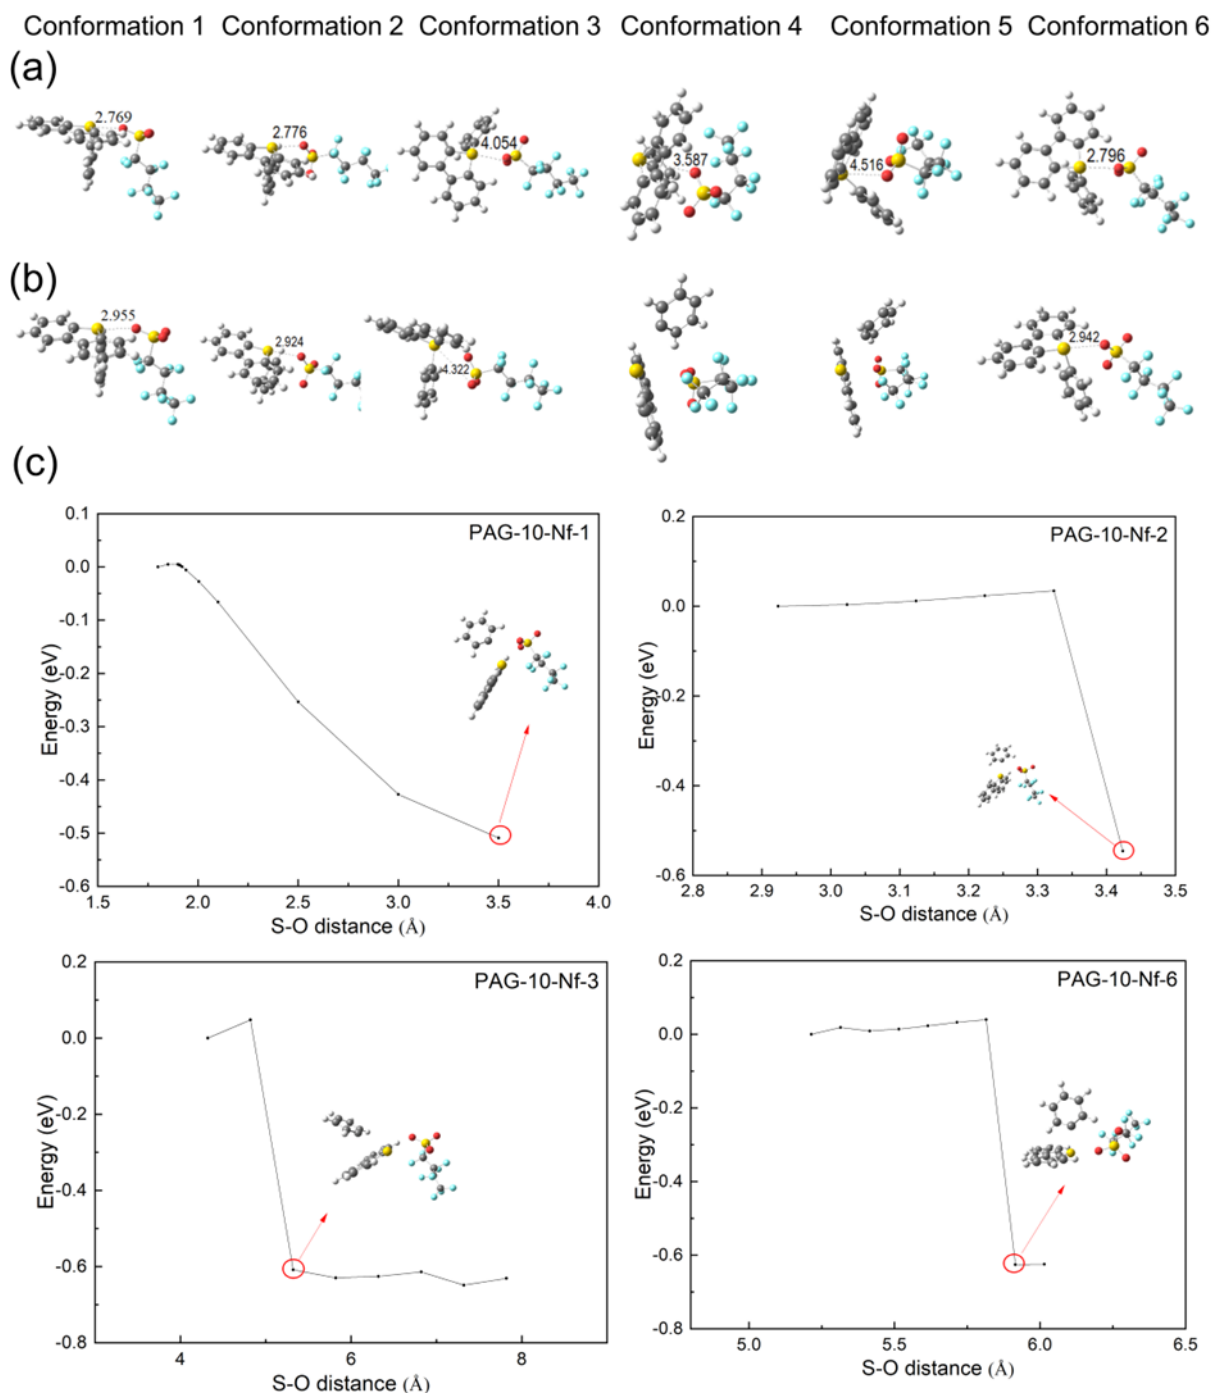

**Figure S27.** (a) The six different conformations of PAG-10-Nf before secondary electron attachment. (b) The six different conformations of PAG-10-Nf after secondary electron attachment. (c) The potential energy as a function of the S-O bond length for the Conformation 1, Conformation 2, Conformation 3, and Conformation 6 of PAG-10-Nf after secondary electron attachment.

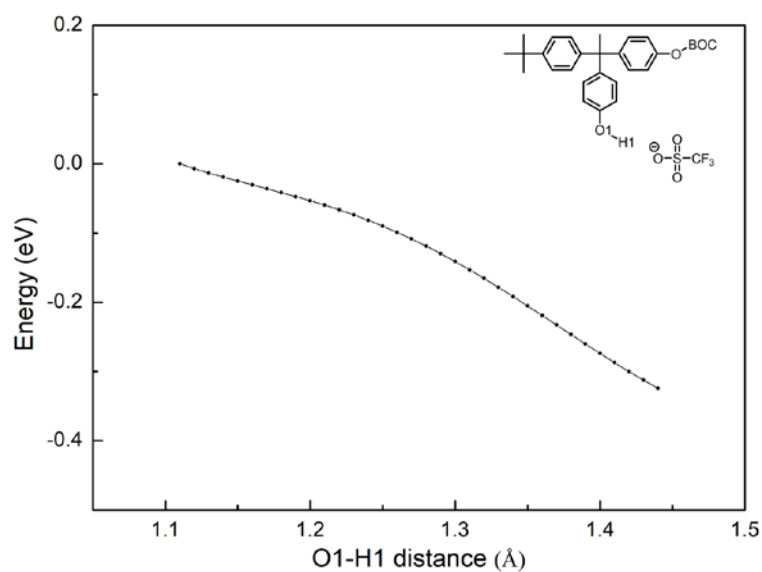

**Figure S28.** The potential energy as a function of the O1-H1 bond of CR4-BOC<sup>+</sup>-Tf<sup>-</sup>.

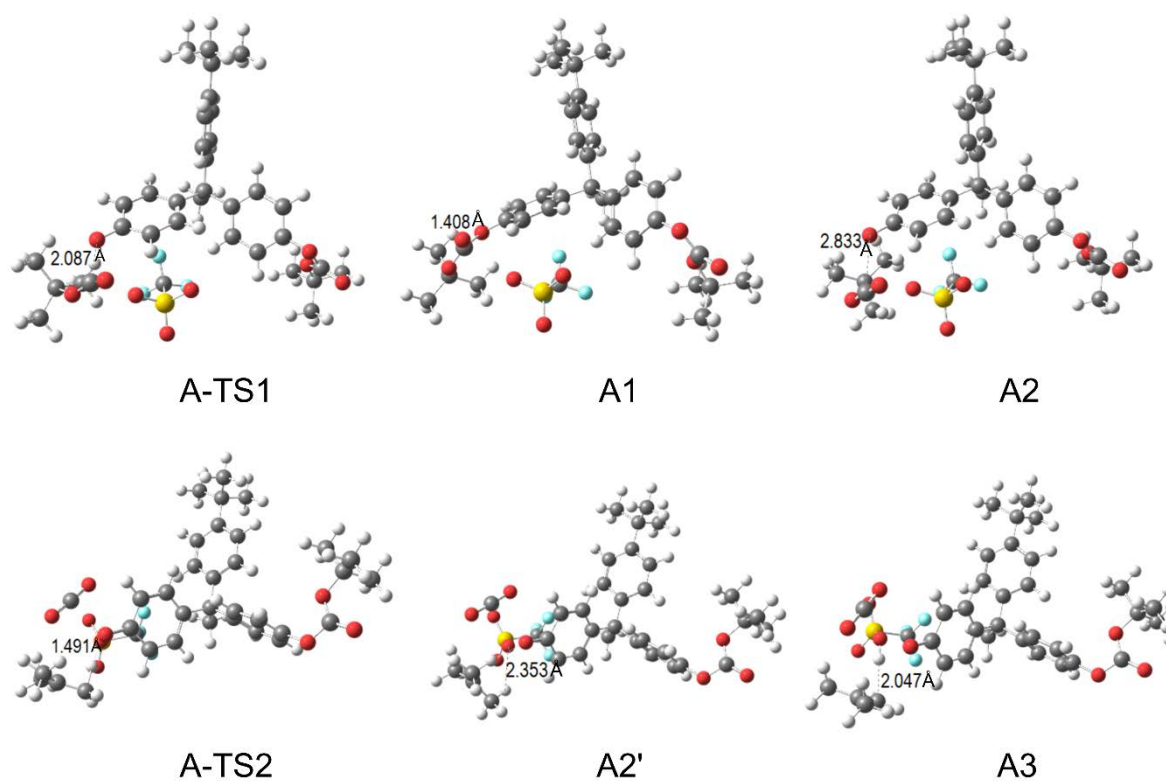

**Figure S29.** Molecular configurations of the transition state, the reactant, and the product of Pathway A in Fig. 4.

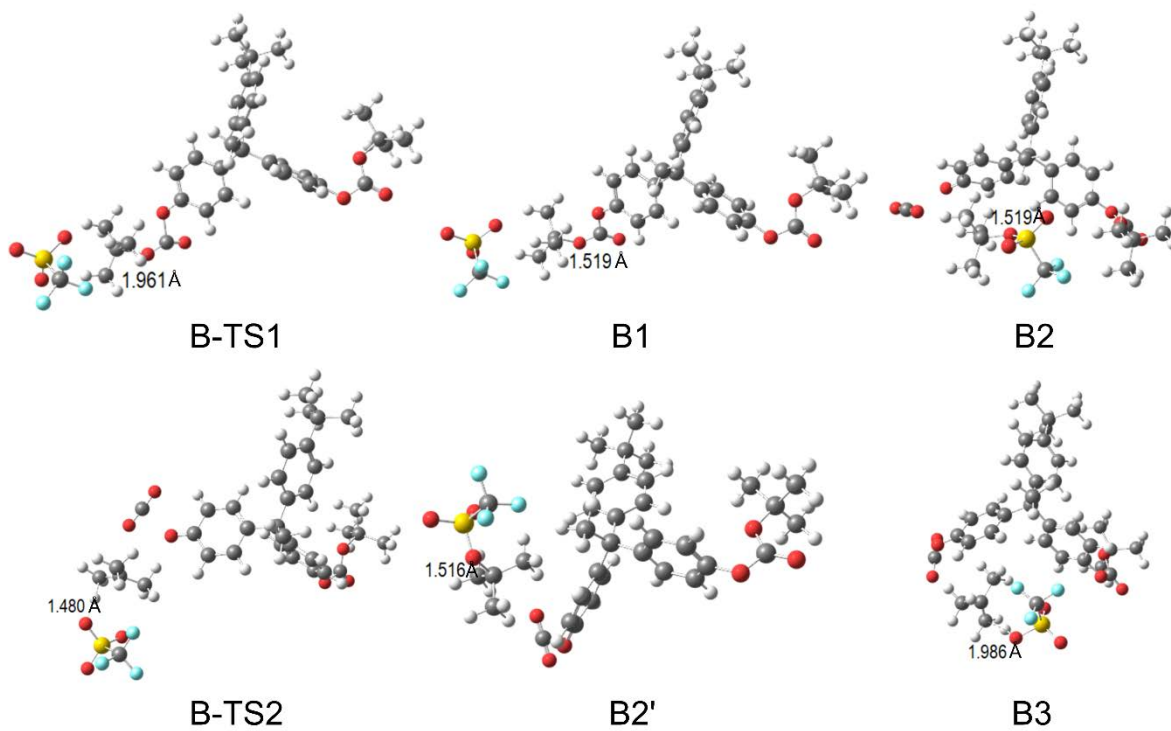

**Figure S30.** Molecular configurations of the transition state, the reactant, and the product of Pathway B in **Fig. 4**.

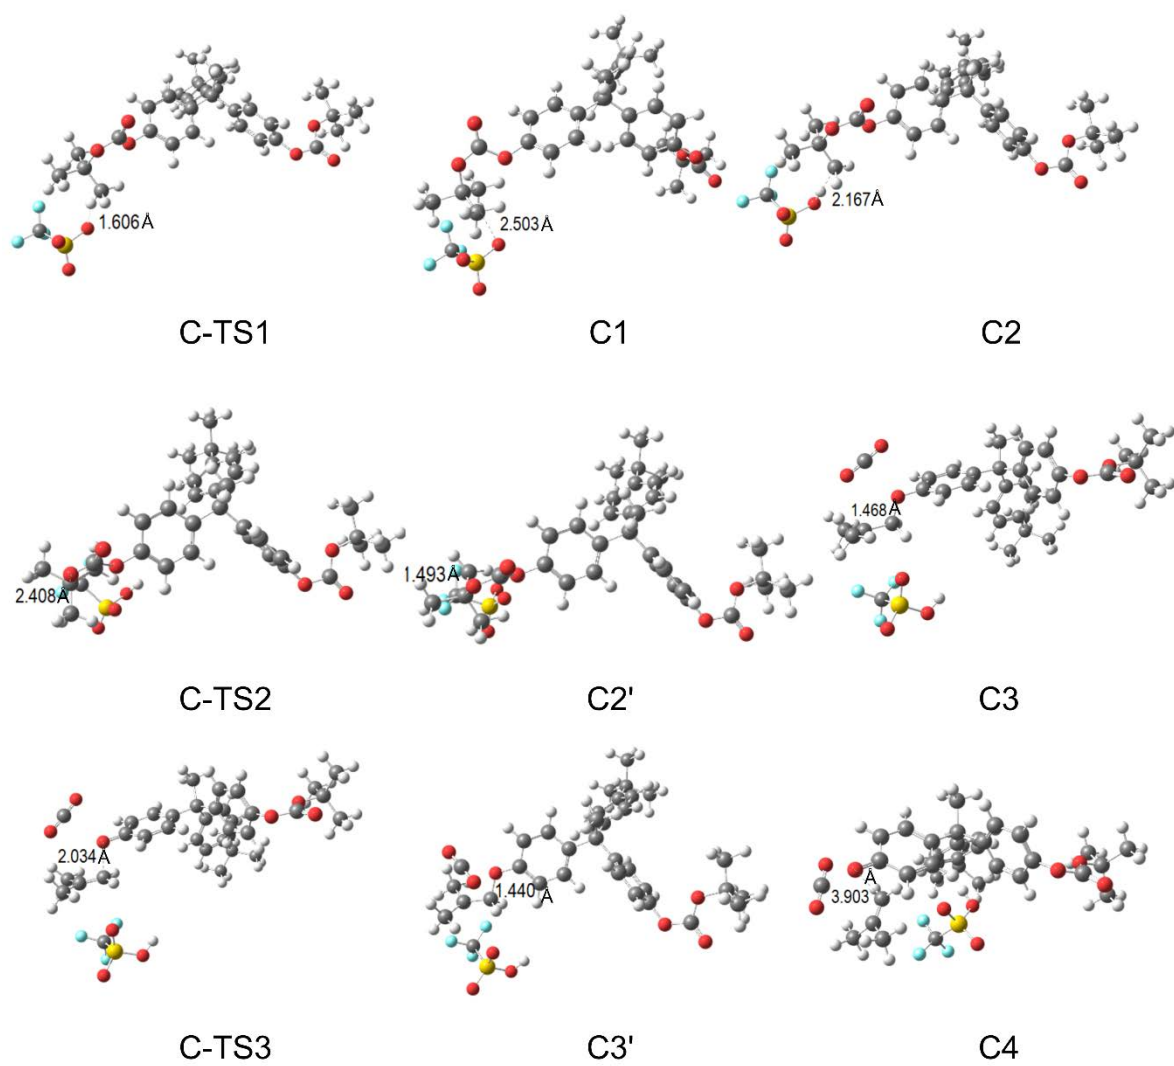

**Figure S31.** Molecular configurations of the transition state, the reactant, and the product of Pathway C in **Fig. 4**.

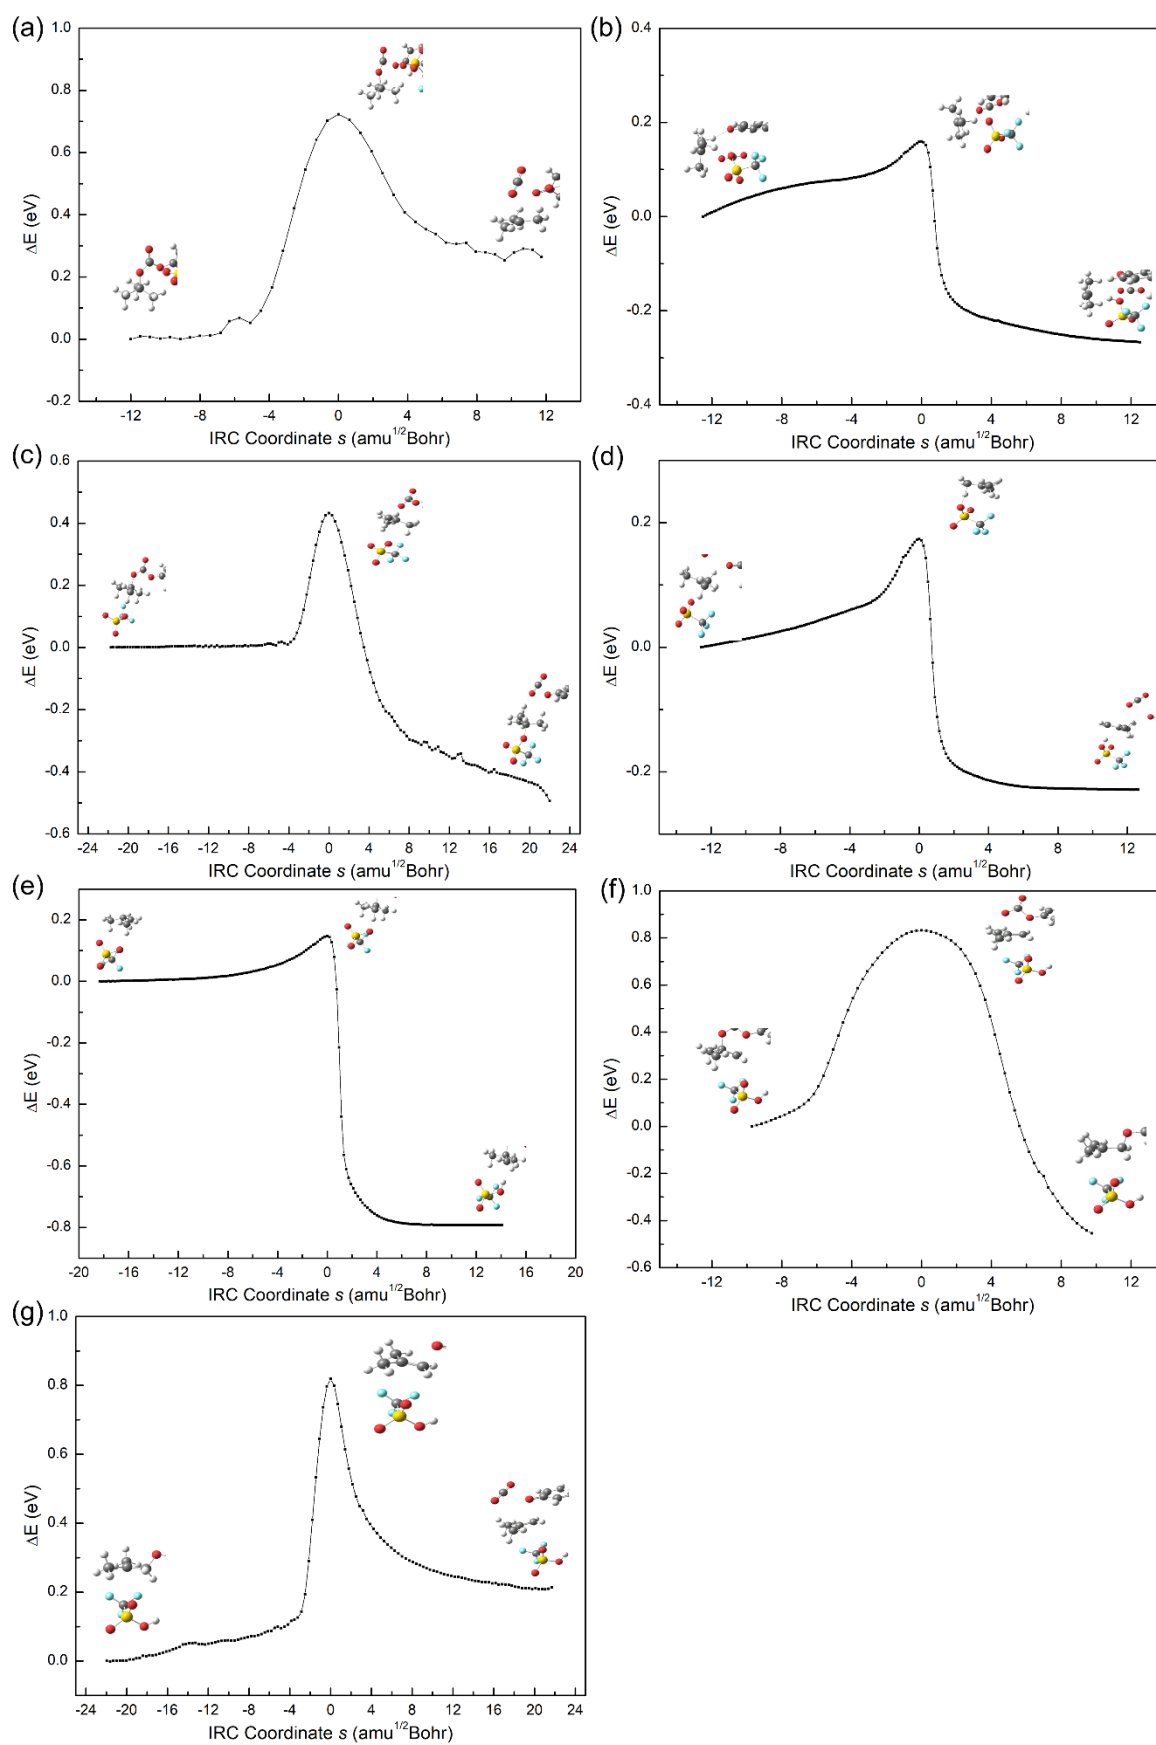

**Figure S32.** The potential energies along the IRCs for (a) A-TS1, (b) A-TS2, (c) B-TS1, (d) B-TS2, (e) C-TS1, (f) C-TS2, and (g) C-TS3 of Tf in **Table 1**.

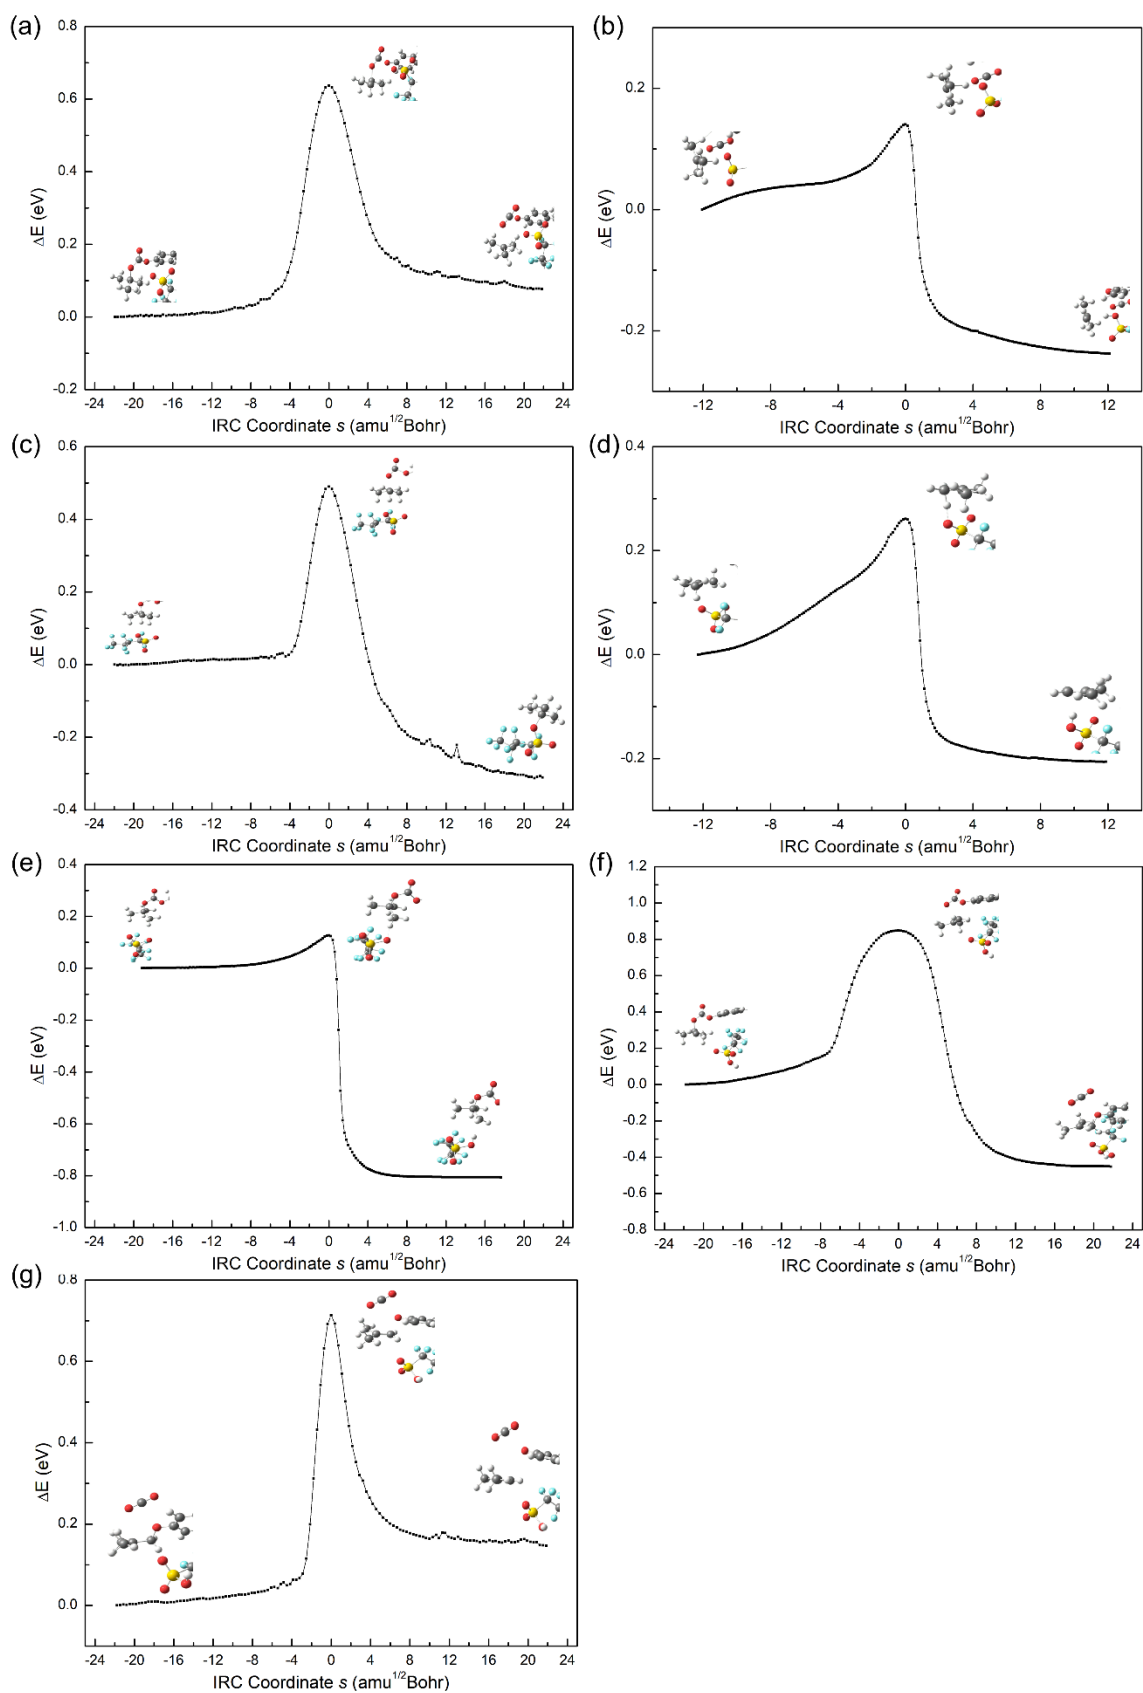

**Figure S33.** The potential energies along the IRCs for (a) A-TS1, (b) A-TS2, (c) B-TS1, (d) B-TS2, (e) C-TS1, (f) C-TS2, and (g) C-TS3 of Nf in **Table 1**.

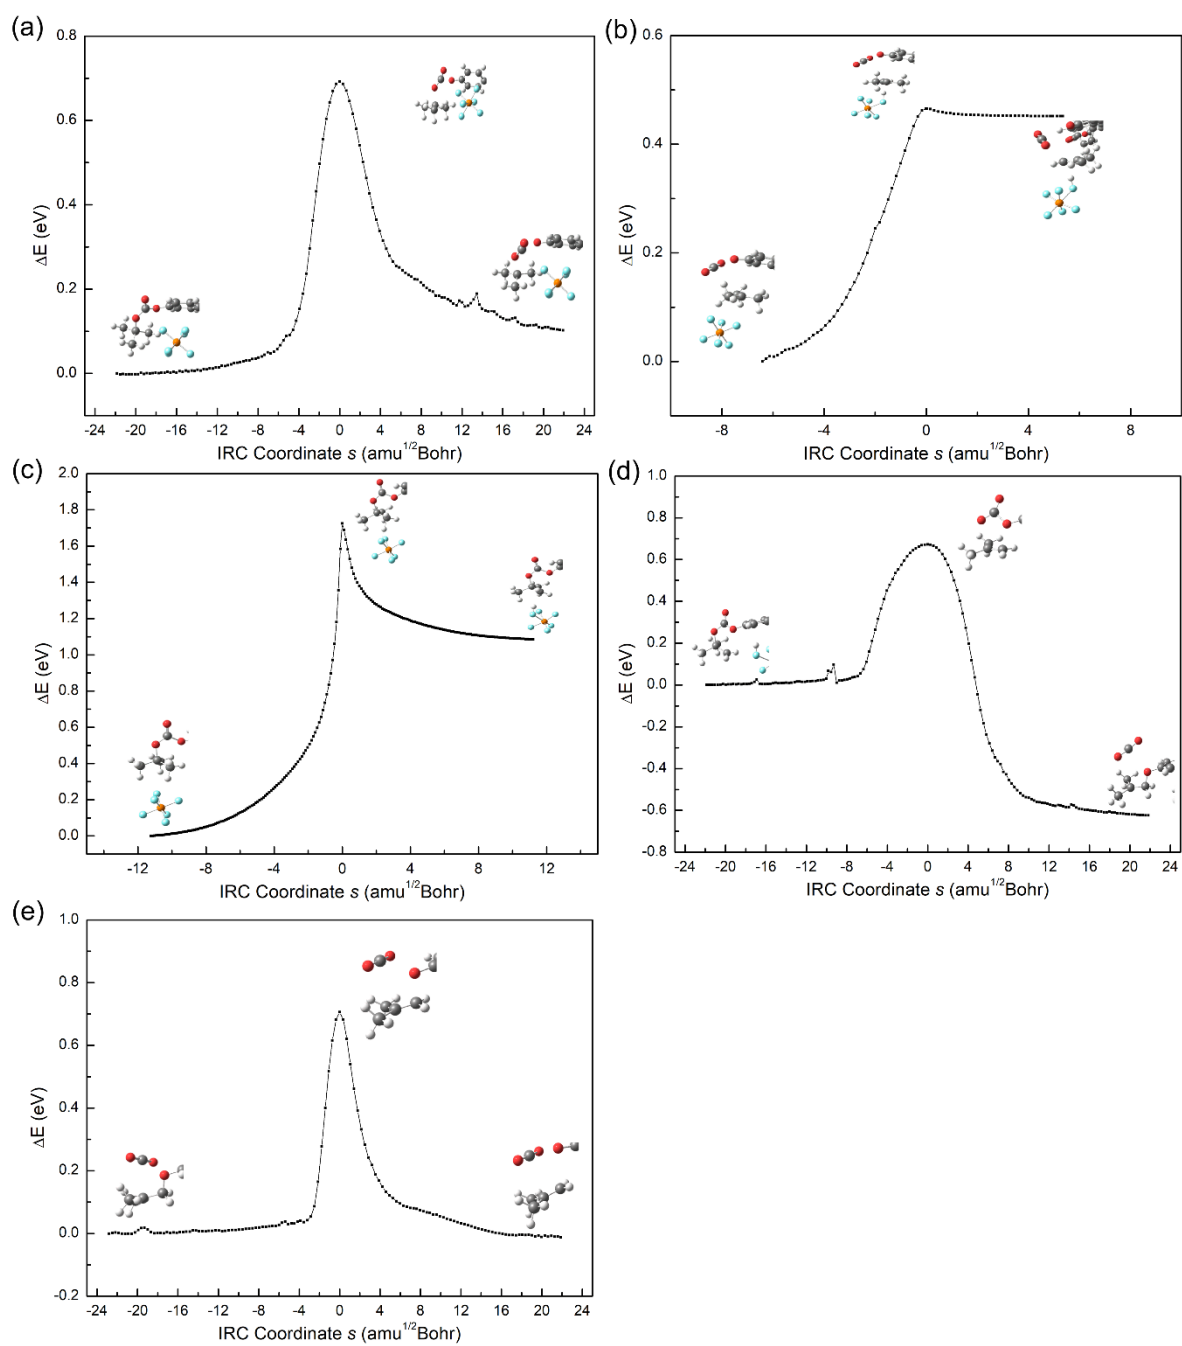

**Figure S34.** The potential energies along the IRCs for (a) A-TS1, (b) A-TS2, (c) C-TS1, (d) C-TS2, and (e) C-TS3 of  $\text{PF}_6^-$  in **Table 1**.

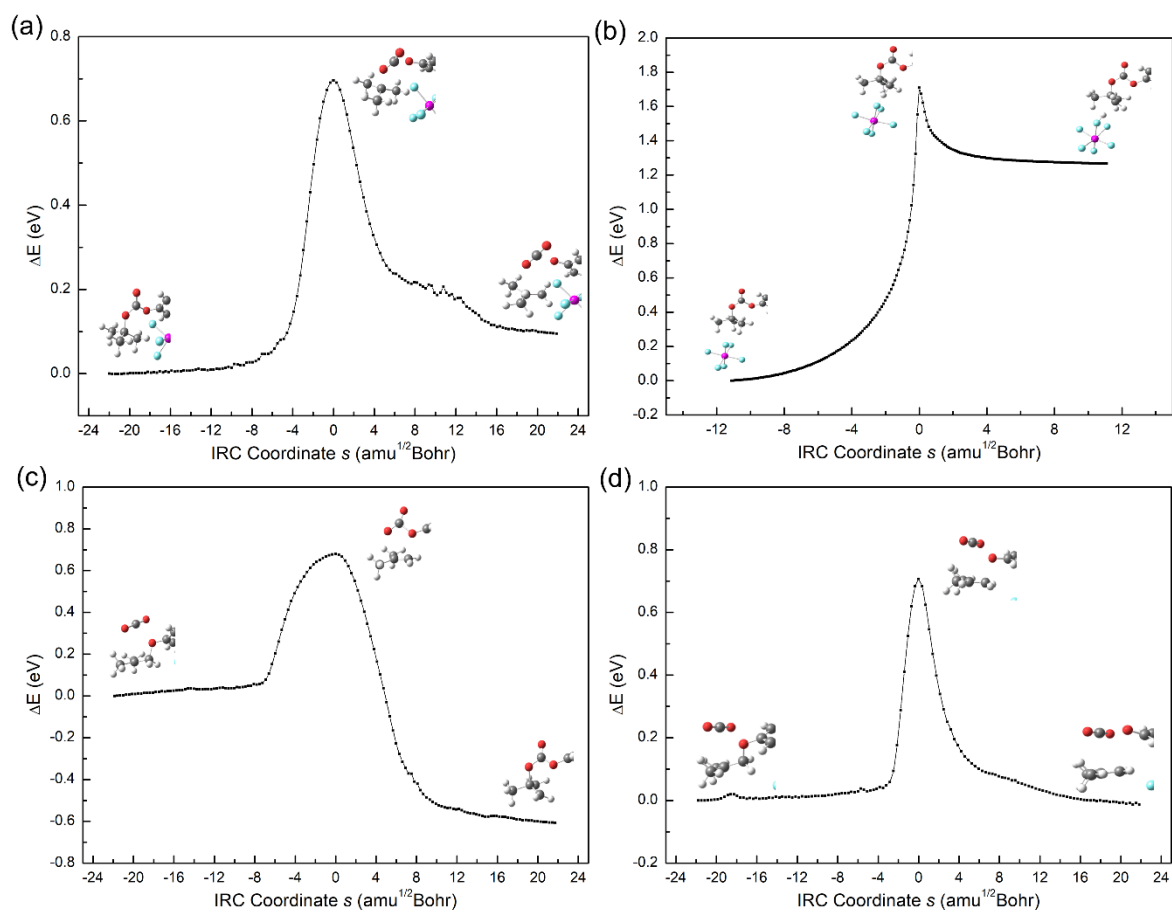

**Figure S35.** The potential energies along the IRCs for (a) A-TS1, (b) C-TS1, (c) C-TS2, and (d) C-TS3 of  $\text{SbF}_6^-$  in **Table 1**.



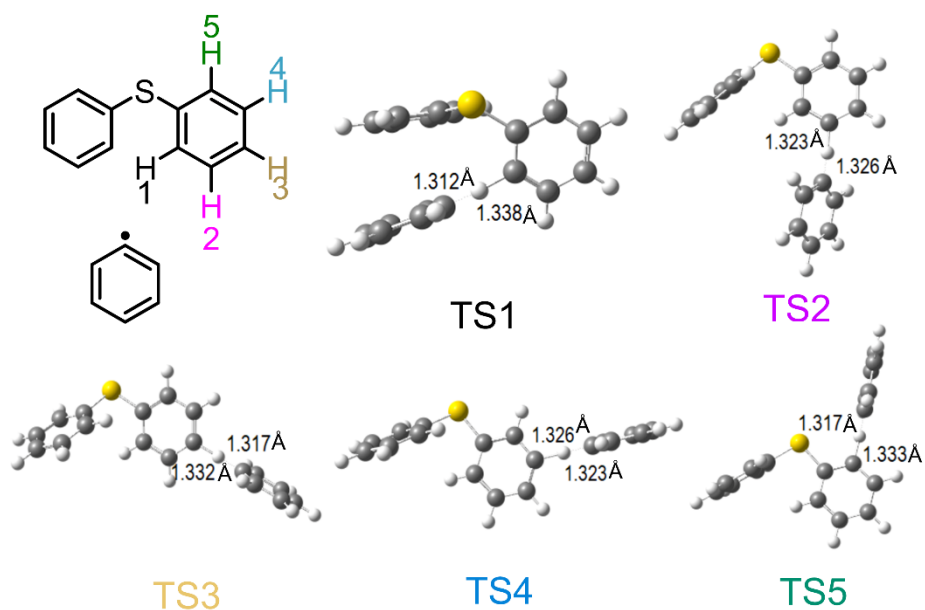

**Figure S36.** The geometries of the transition state for phenyl radical reacting with the DPS in **Fig. 6**.

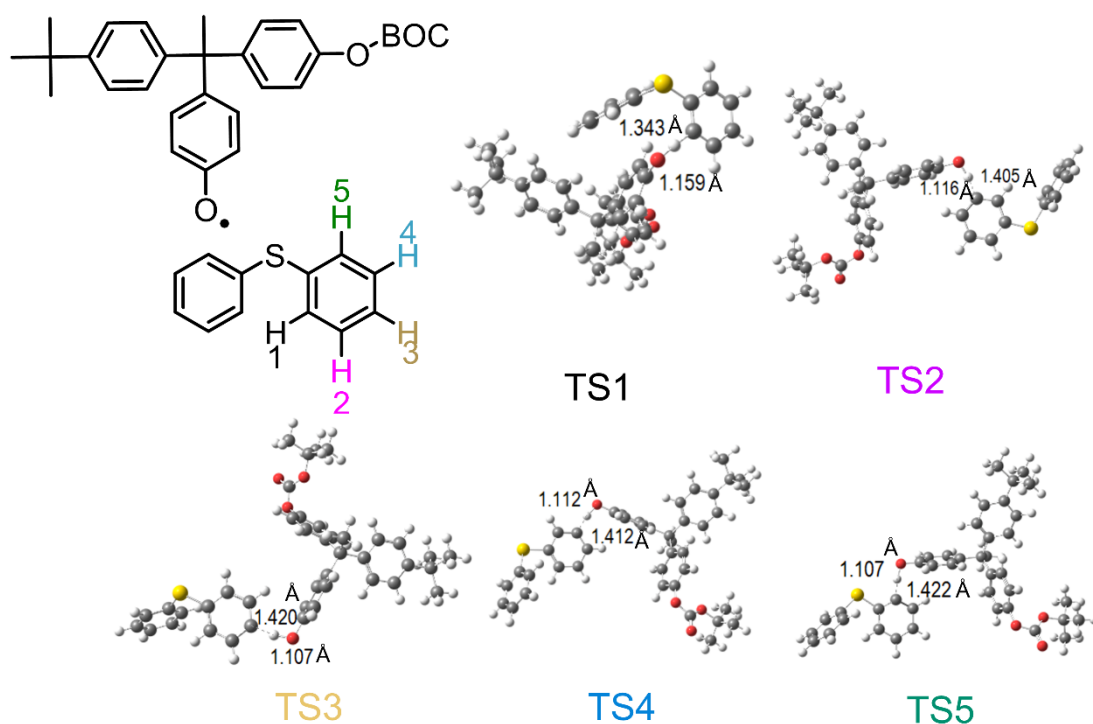

**Figure S37.** The geometries of the transition state for oxygen free radical reacts with the DPS in **Fig. 6**.

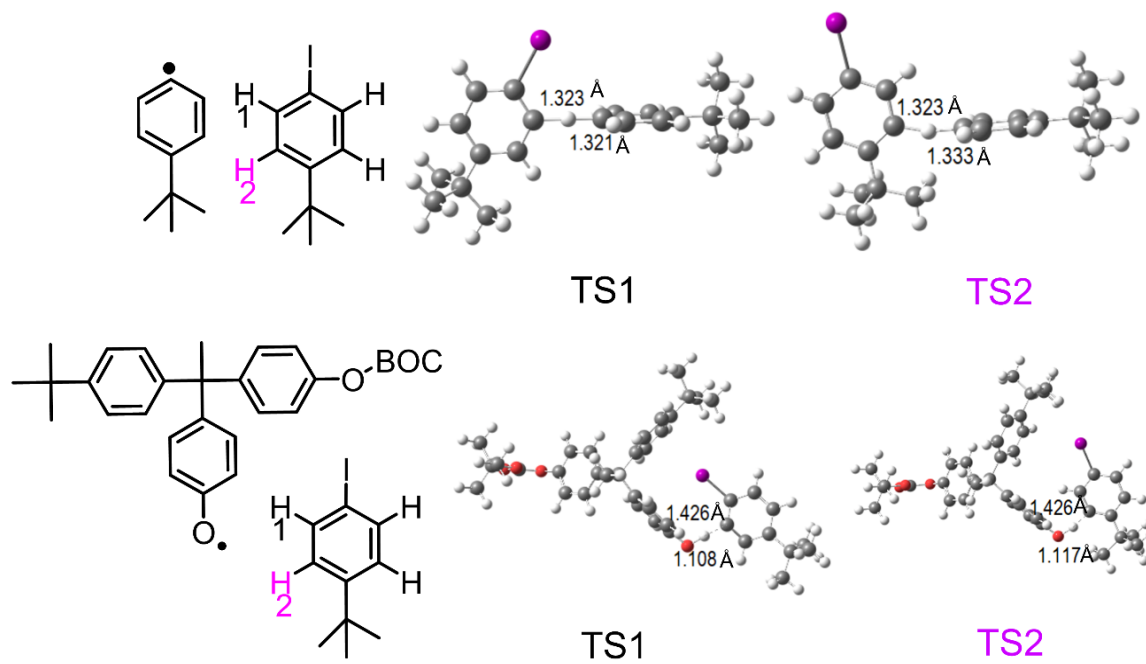

**Figure S38.** The geometries of the transition state for phenyl radical and oxygen-free radical react with the TIB in **Fig. 6**.
